# Supplementary material for: Spatiotemporal Analysis of Urban Green Areas Using Change Detection: A Case Study of Kharkiv, Ukraine
Source: Frontiers journal article supplement (doi:10.3389/fenvs.2022.823129), 2022-03-10
Supplement: Data_Sheet_3.docx [file Data_Sheet_3.docx]

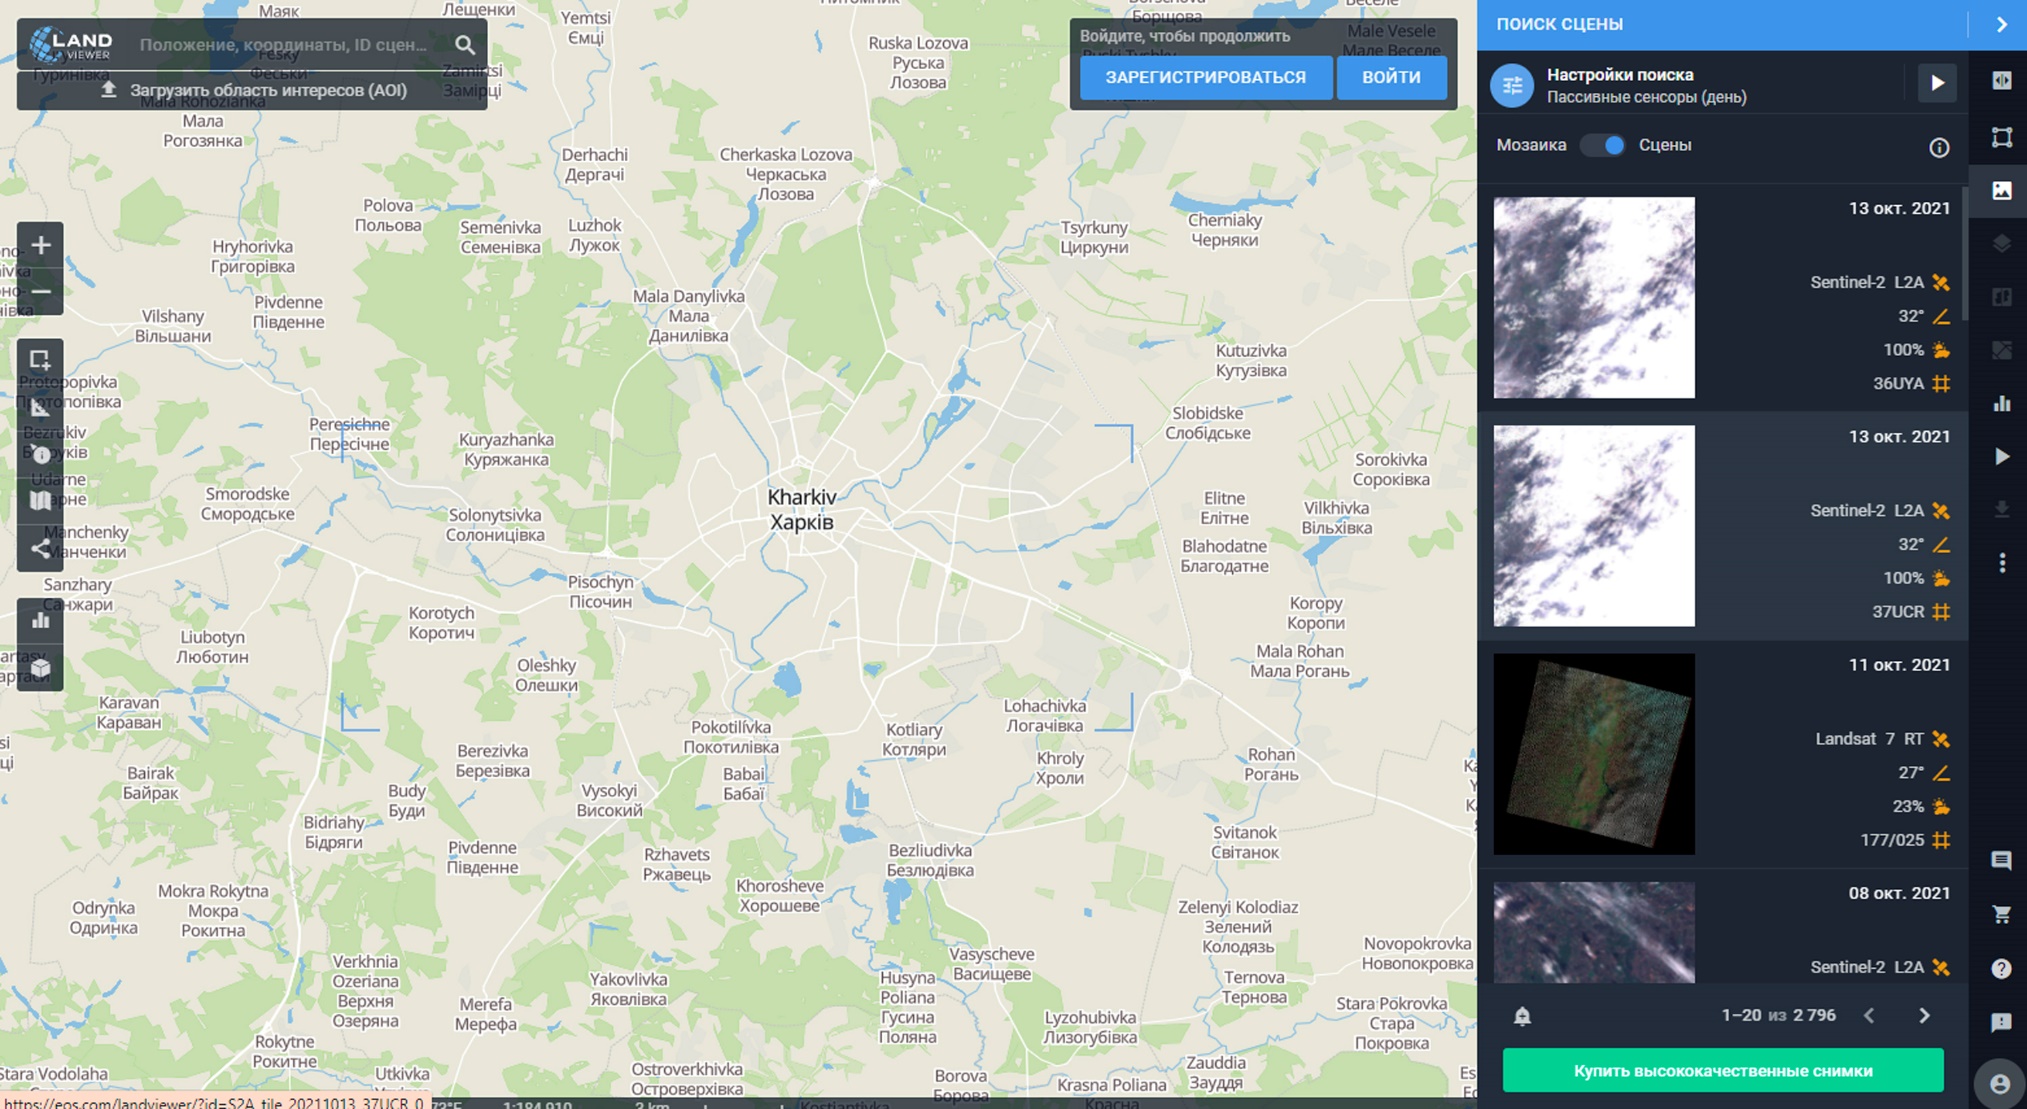


**Supplementary Figure 1.** The web-interface of the EOS satellite image repository

**
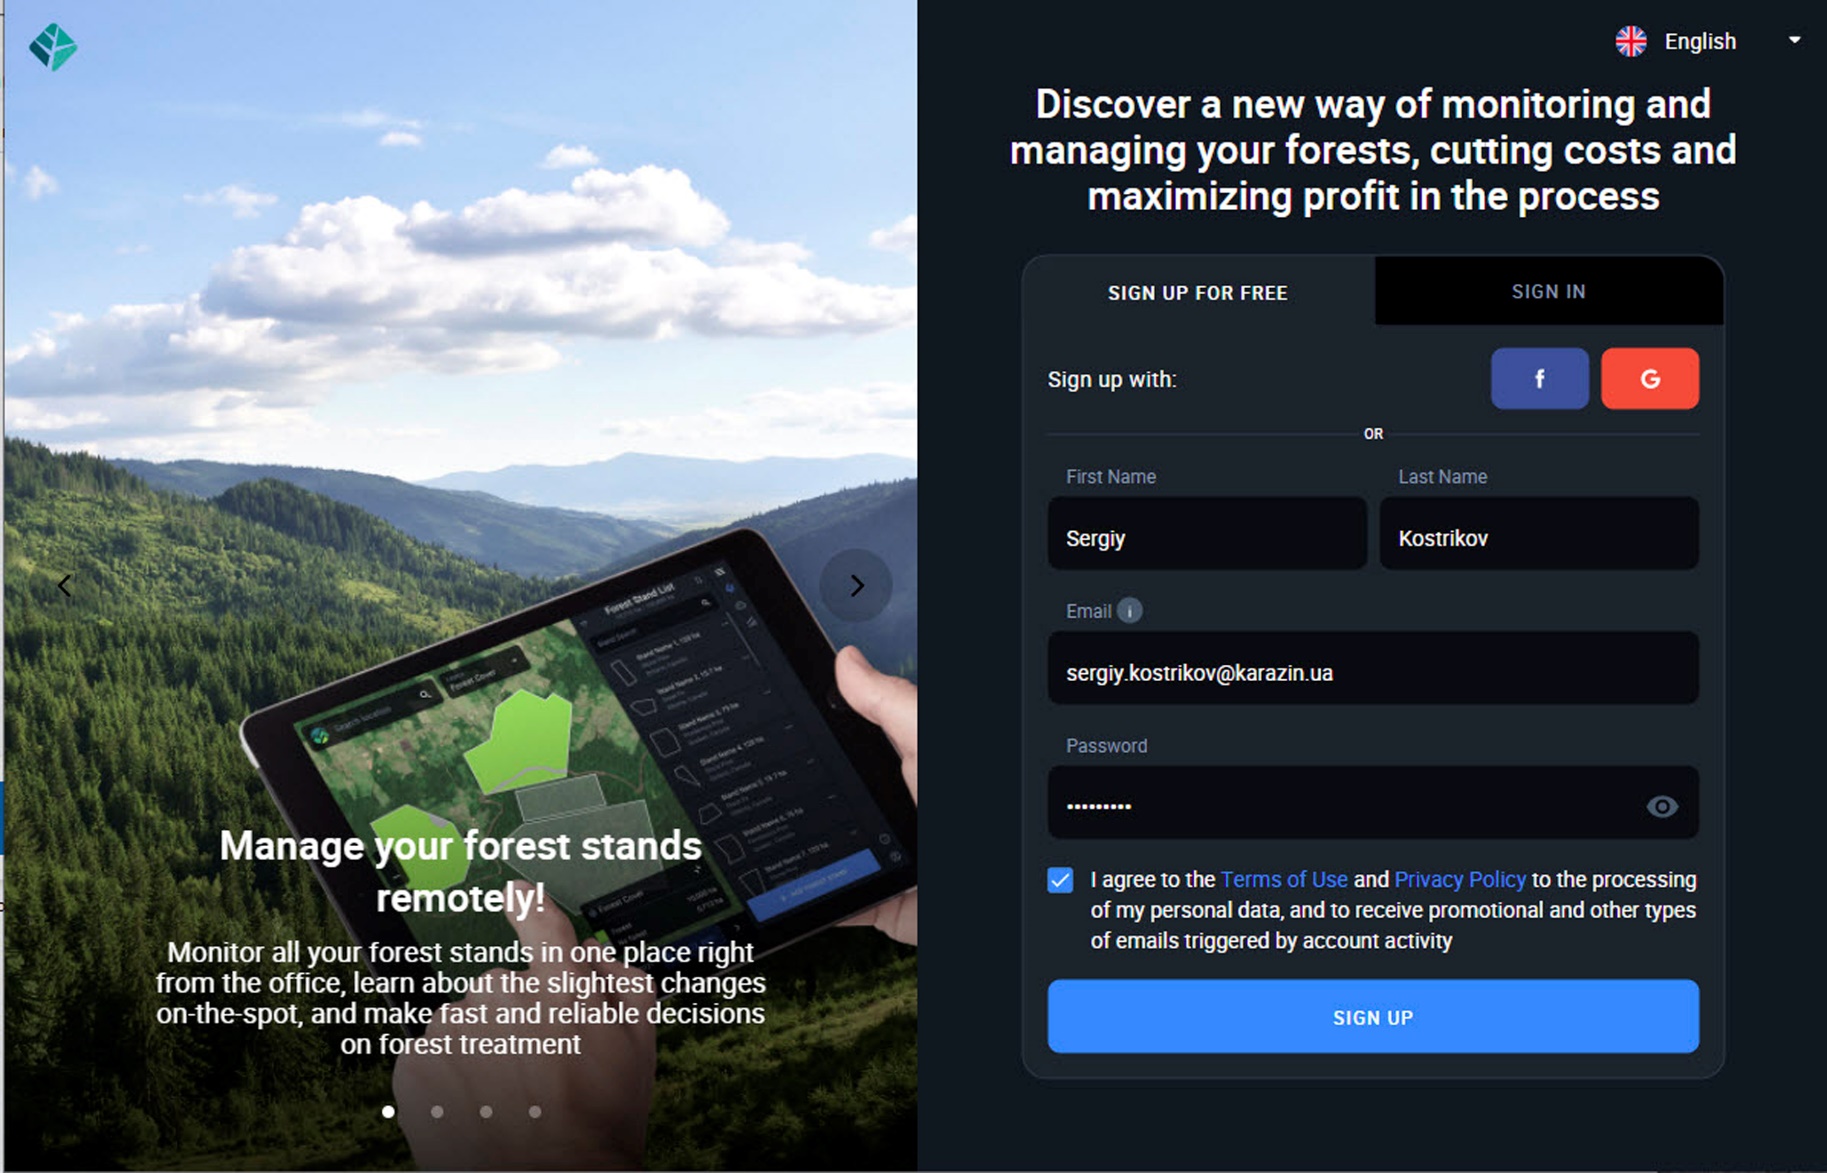
**

**Supplementary Figure 2.** The web-interface of signing up for the EOS *Forest Monitoring* web-service


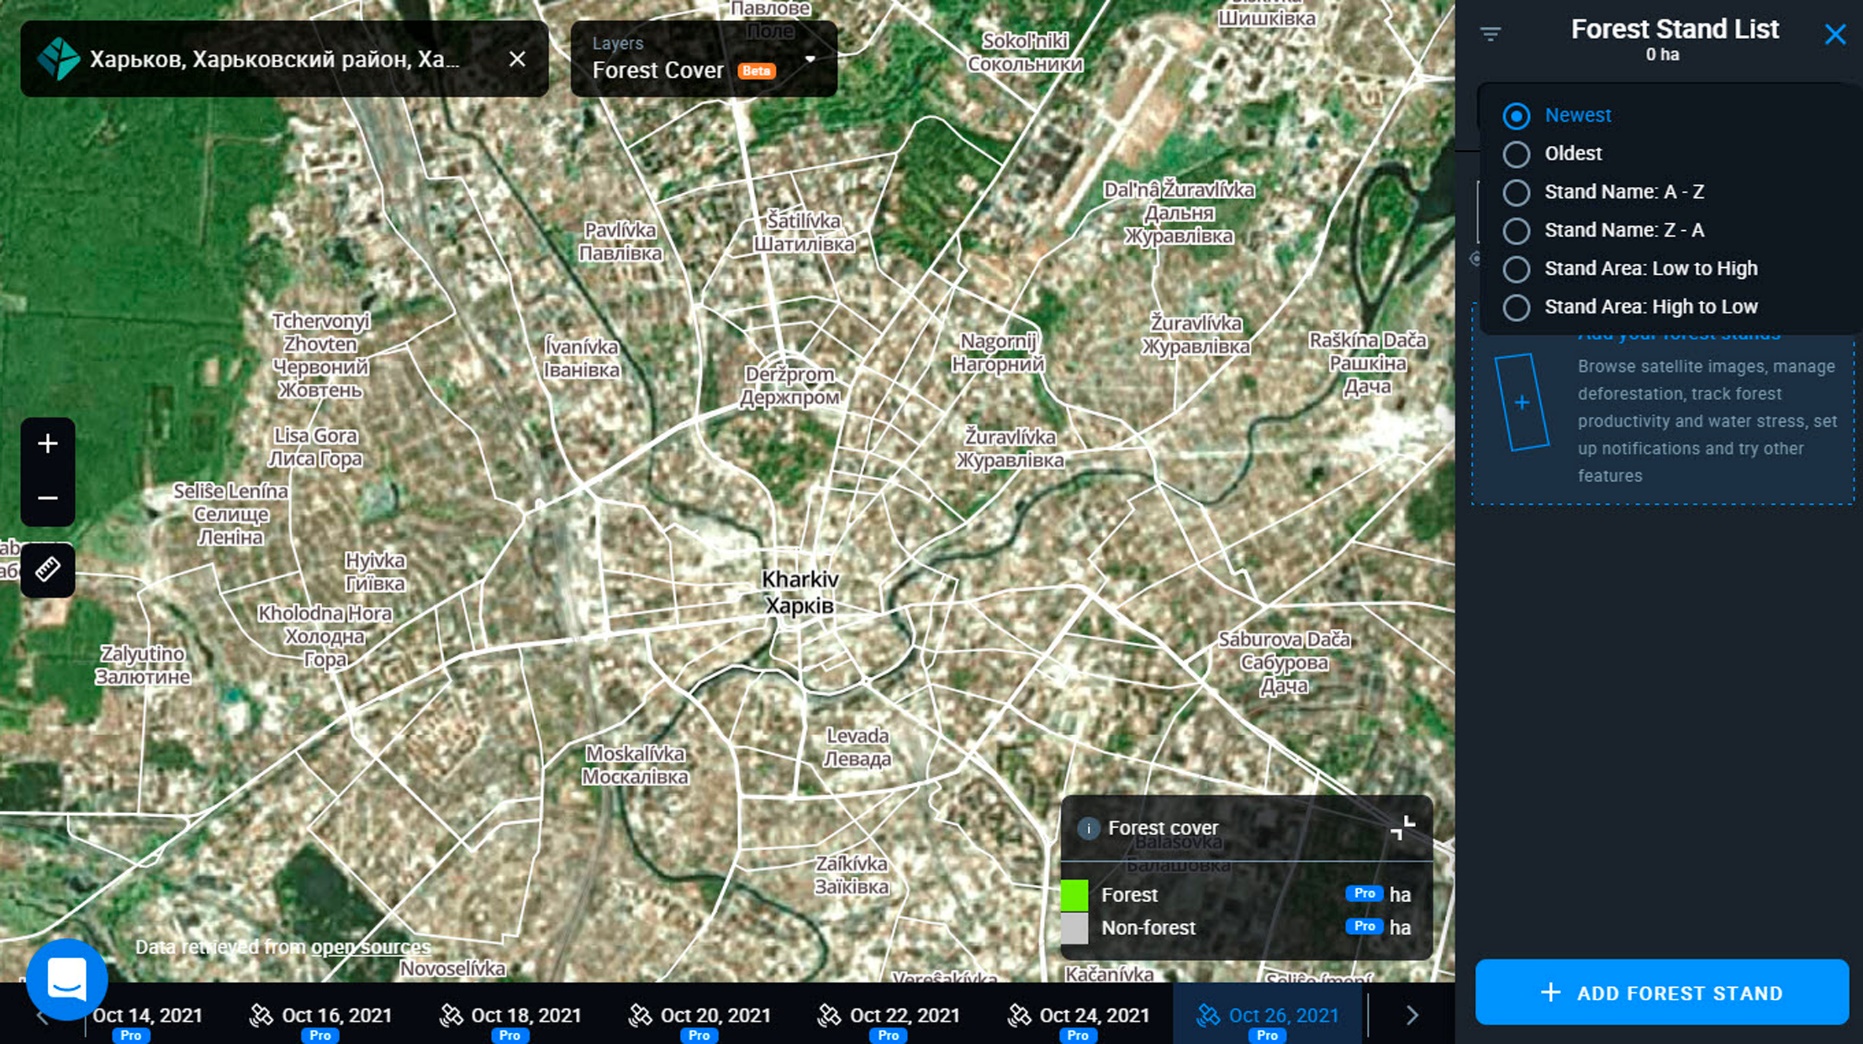


**Supplementary Figure 3.** The selected AOI of Kharkiv-City in the EOS *Forest Monitoring* web-service (<https://forest-monitoring.eos.com/main-map>)


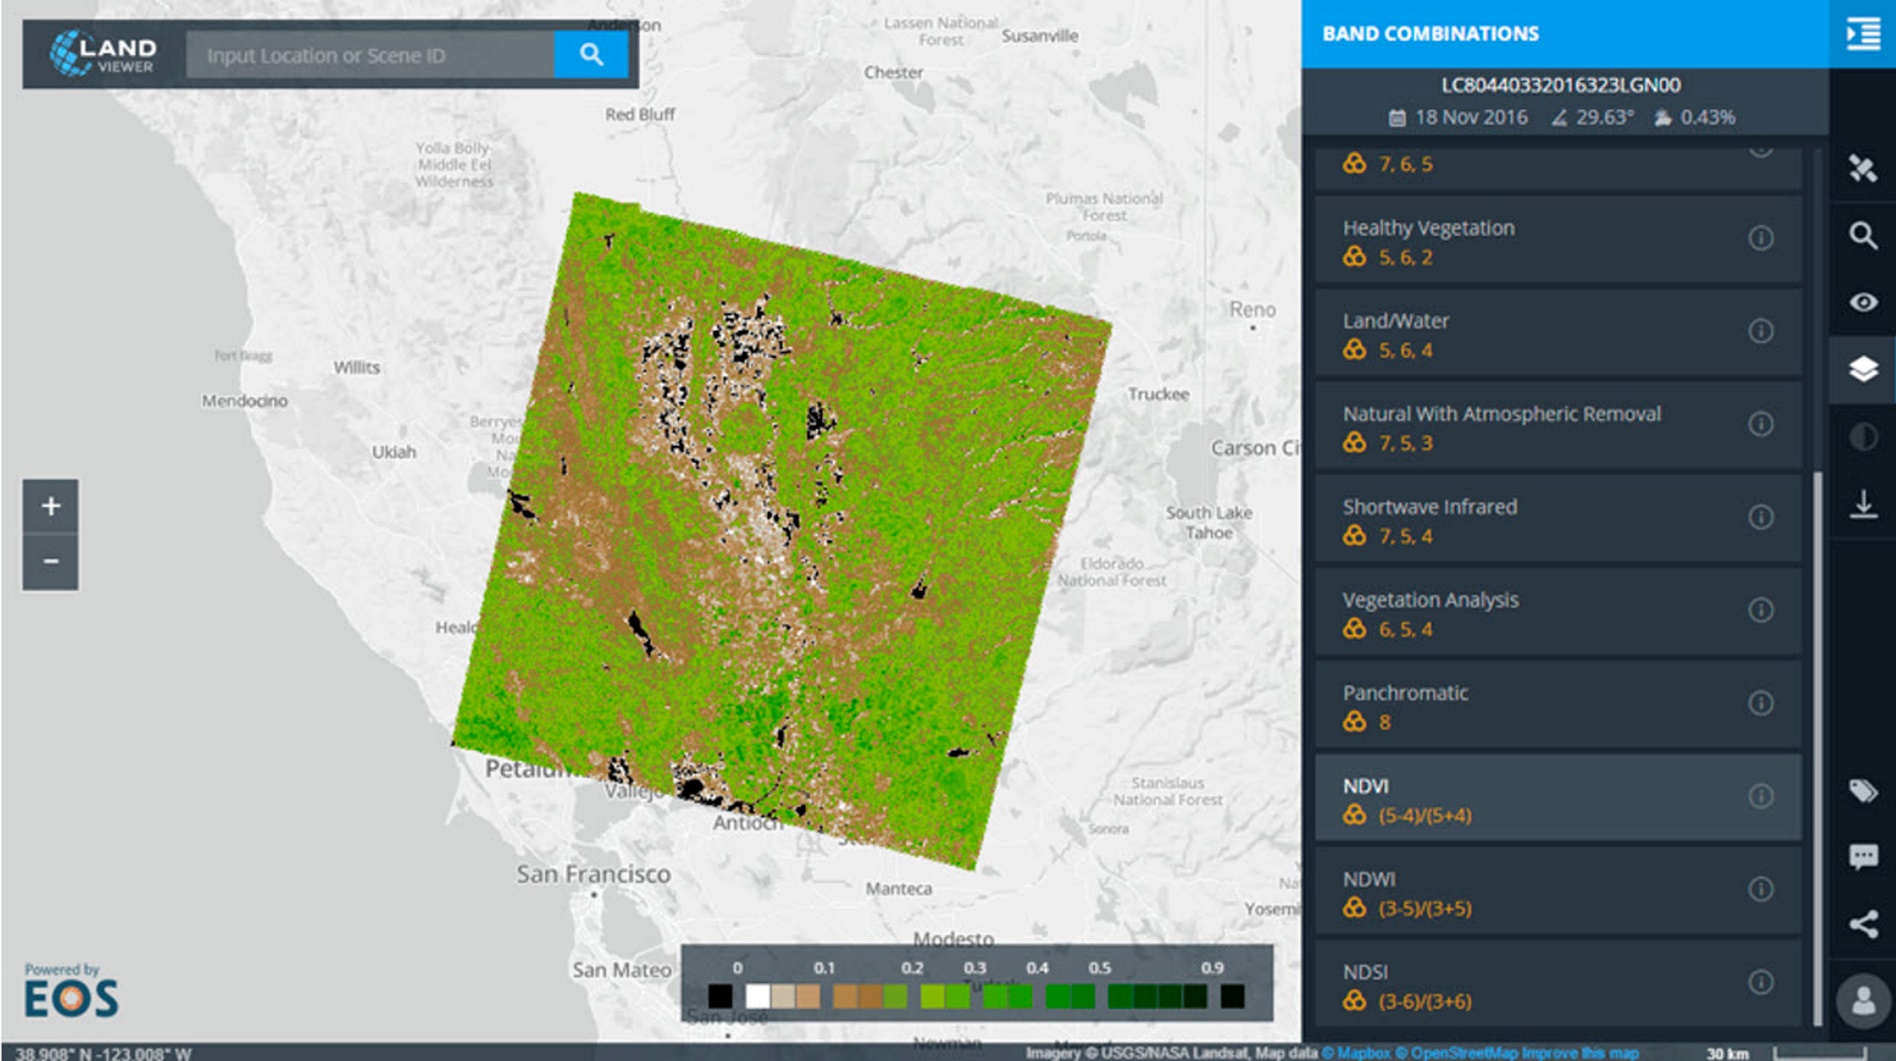


**Supplementary Figure 4.** Customization of the *LV* image browser functionality in its web-interface according to a task prescribed to a certain AOI


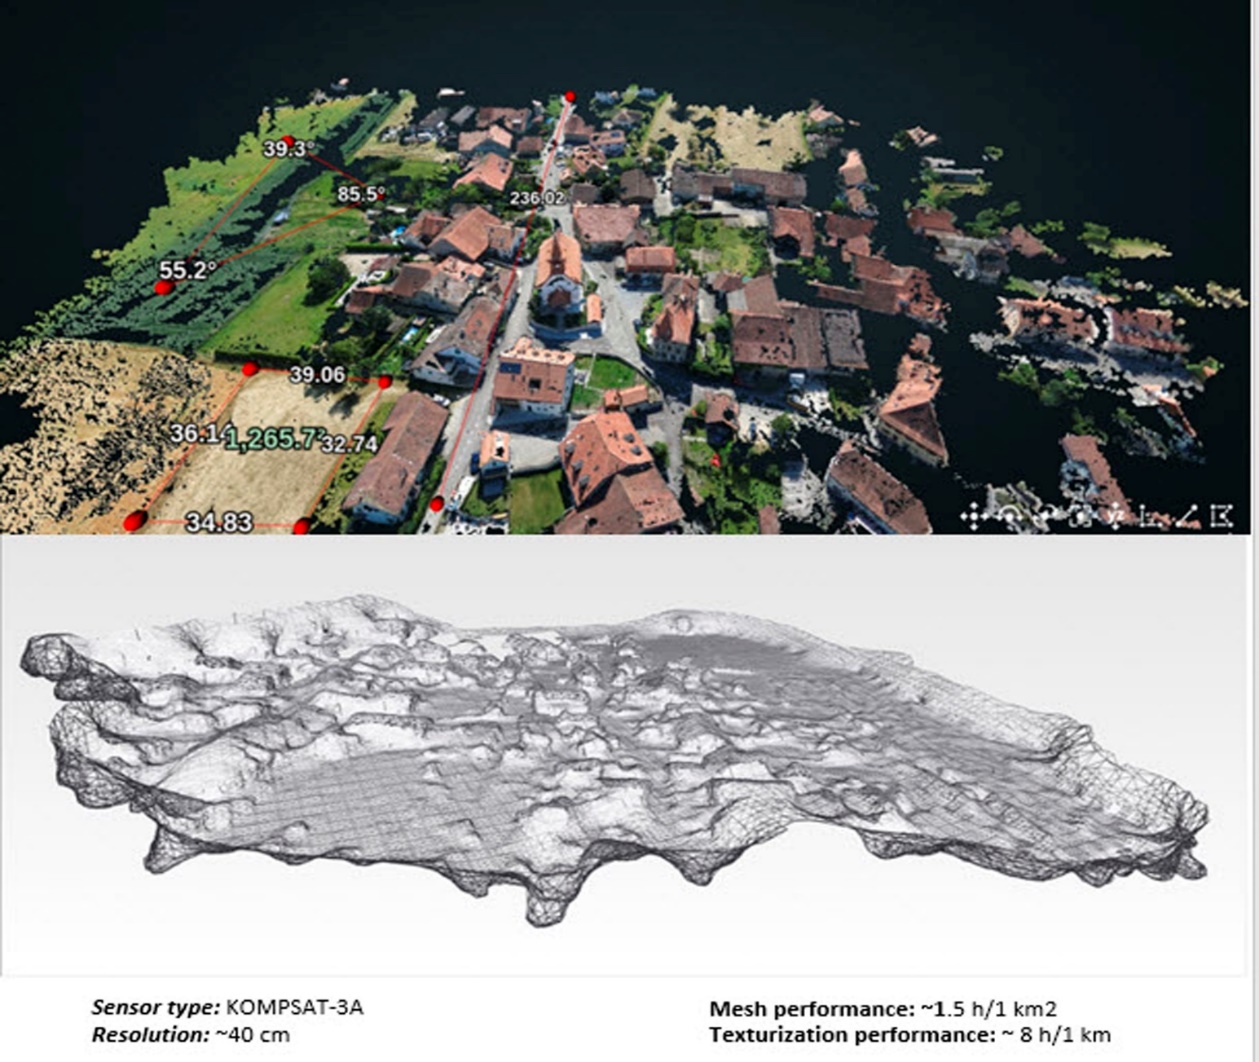


**Supplementary Figure 5.** A small parcel (around 2,5 ha) located in the northern part of our AOI visualized in the customized EOS platform web-interface. It illustrates in a large scale the photo-cloud based classification mapping for yearly change detection in UGA


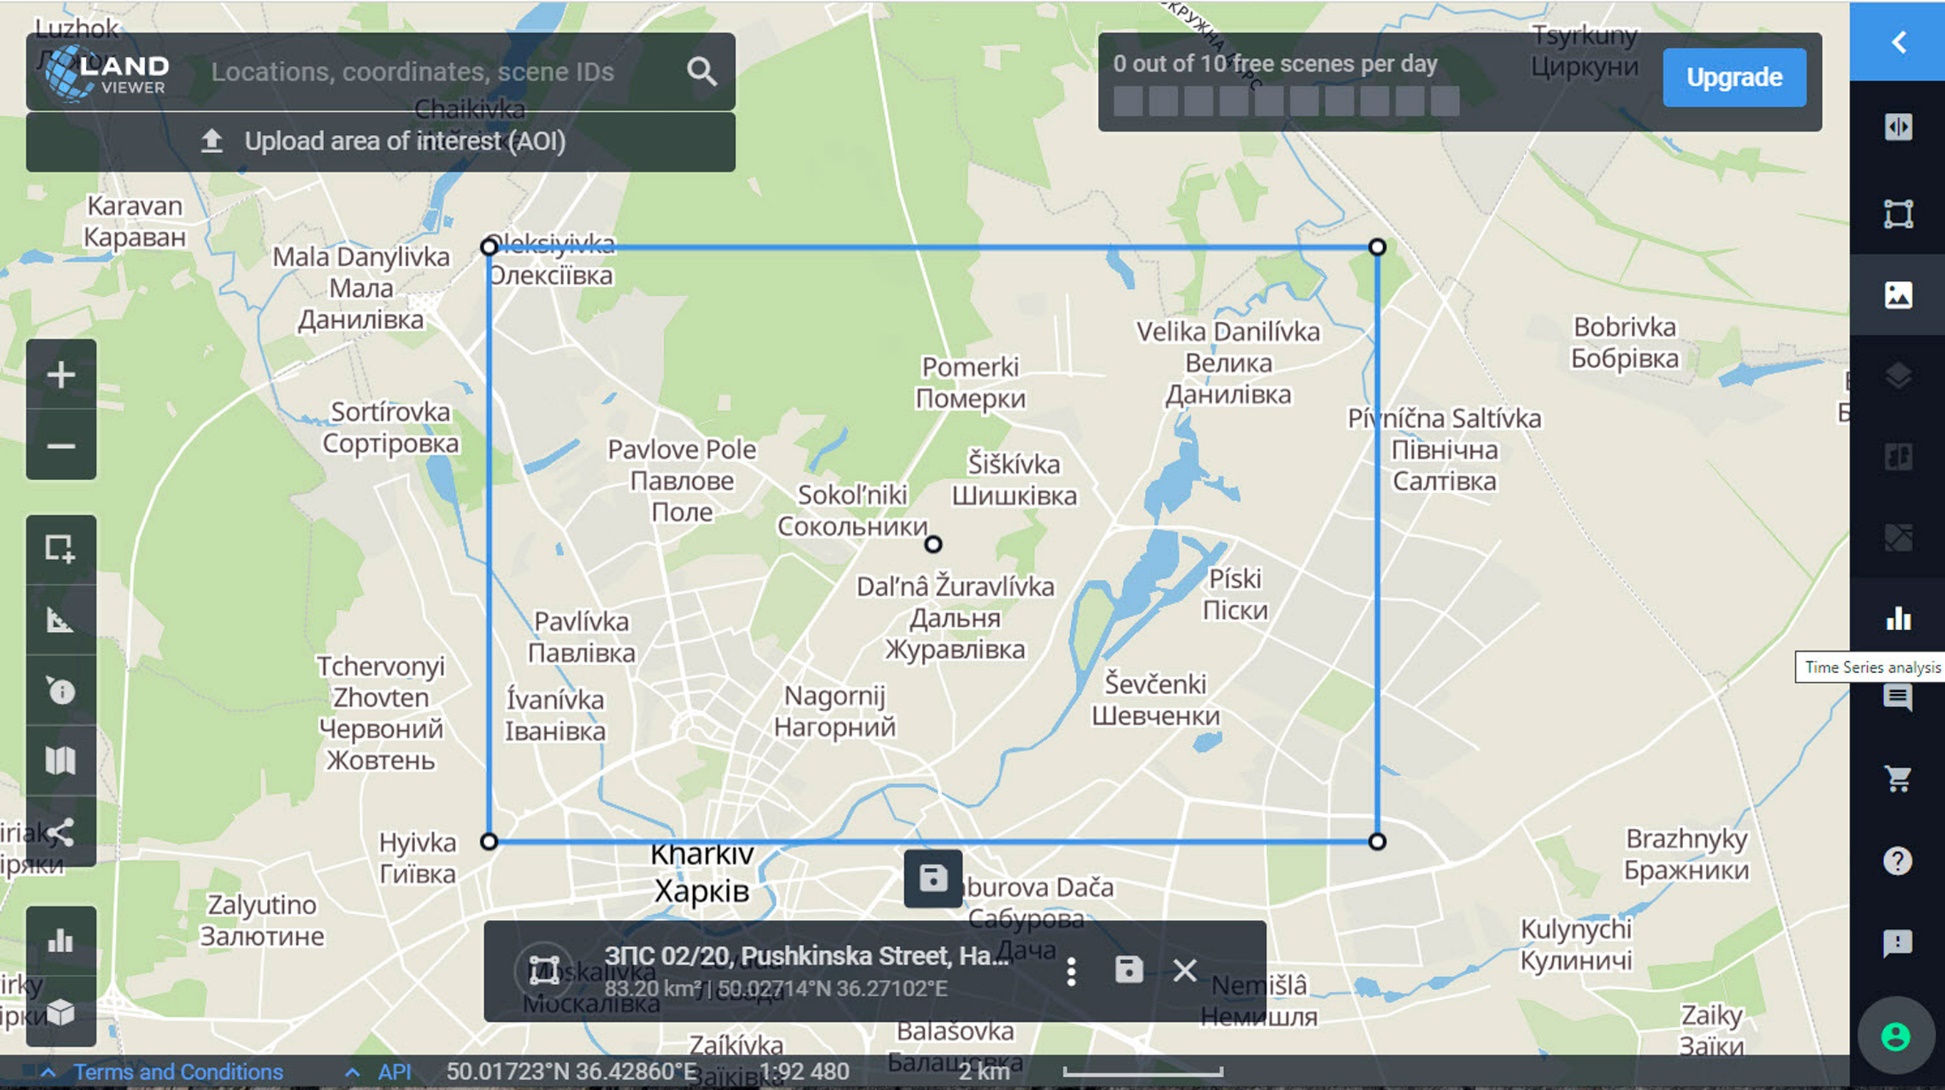


**Supplementary Figure 6.** The northern part (not more than 100 km2) of Kharkiv AOI selected for calculating aggregated NDVI values in long time interval (2000-2020)


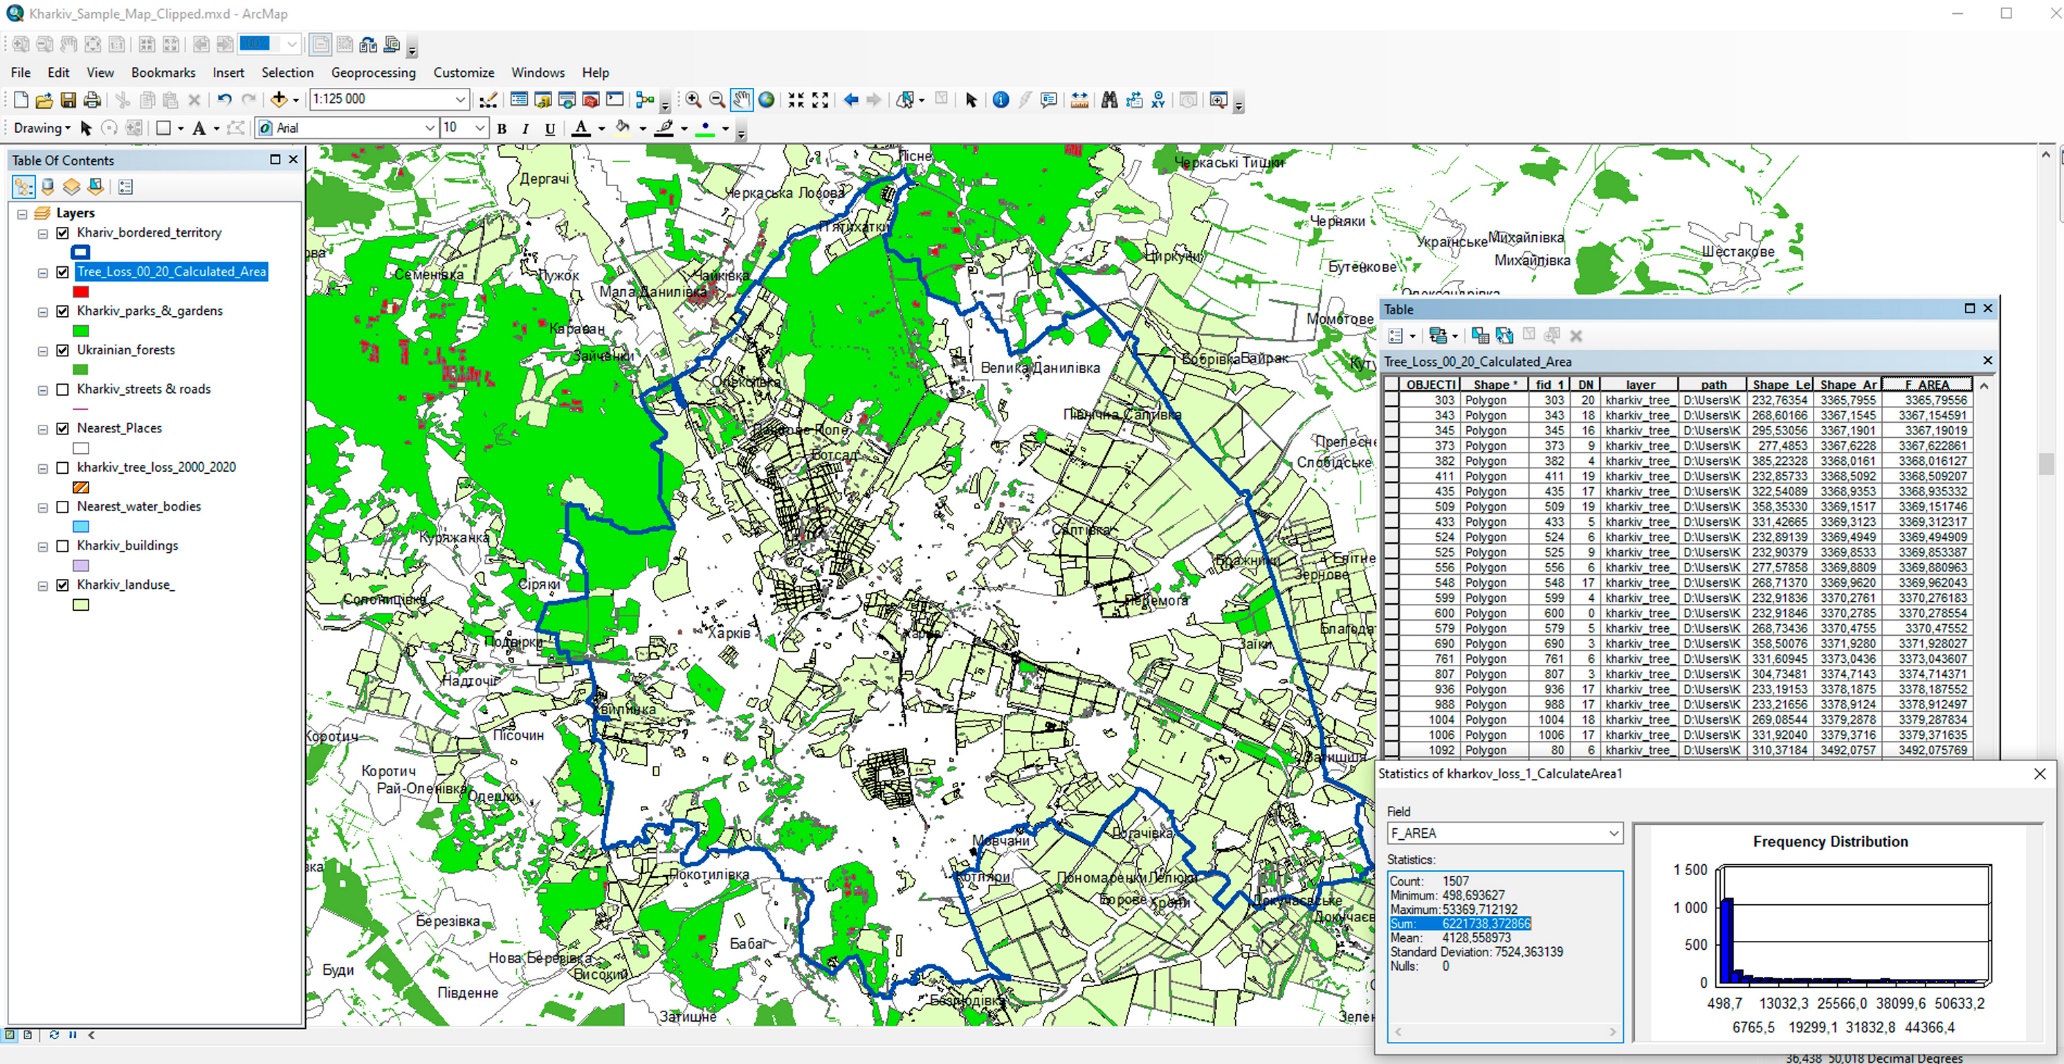


**Supplementary** **Figure 7.** Calculated areas of *622 ha* due to thetotal USL values within the city and beyond its official border – in the nearest suburbs (GIS-project GDK-2)


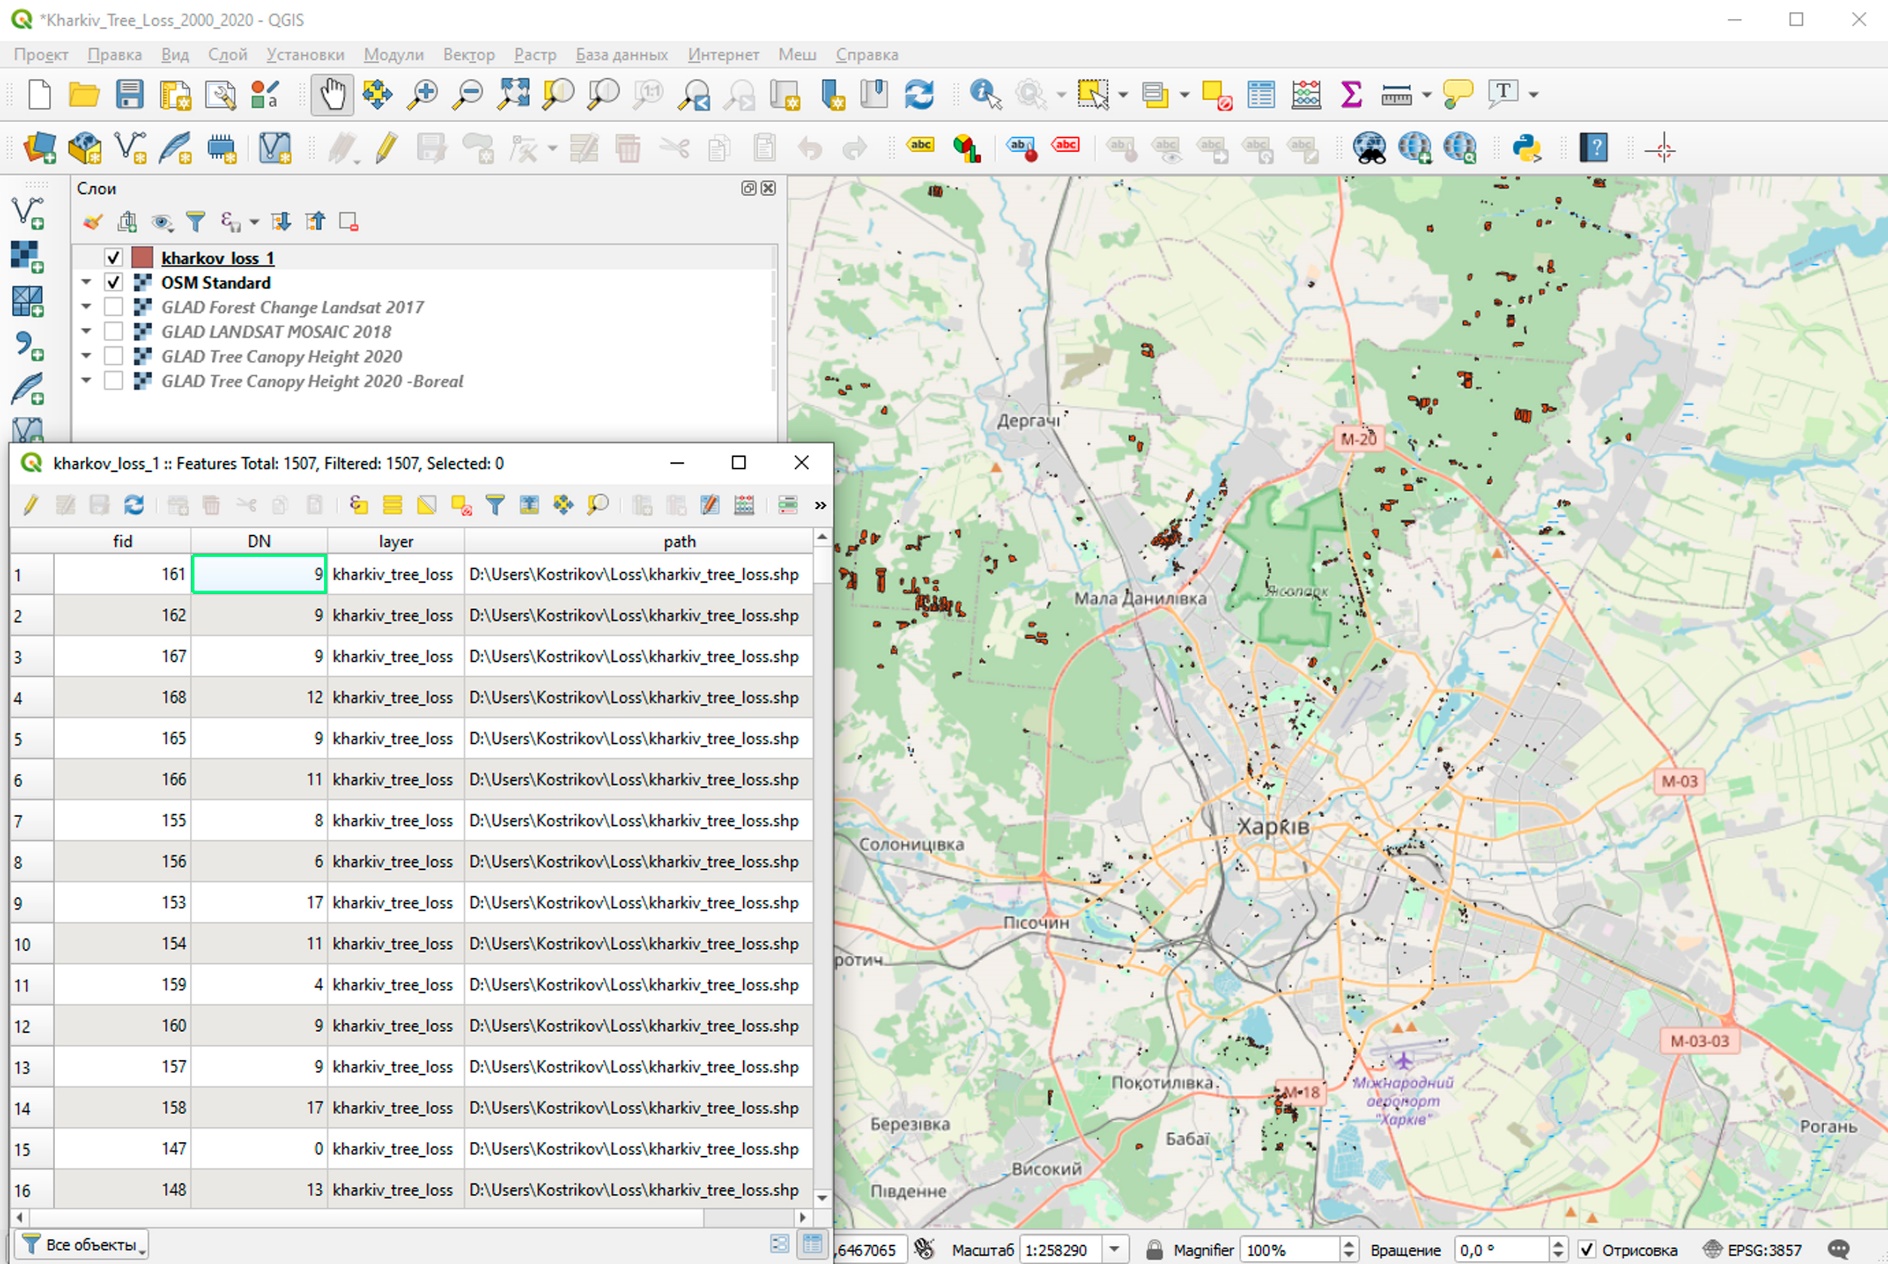


**Supplementary Figure 8.** The attribute table of the USL polygonal feature layer in *QGIS* interface, where a year of loss could be distinguished in the *DN* (Distinguishing Number) column, in which one- and two-digit integers corresponded to a certain year in 2000-2020 range


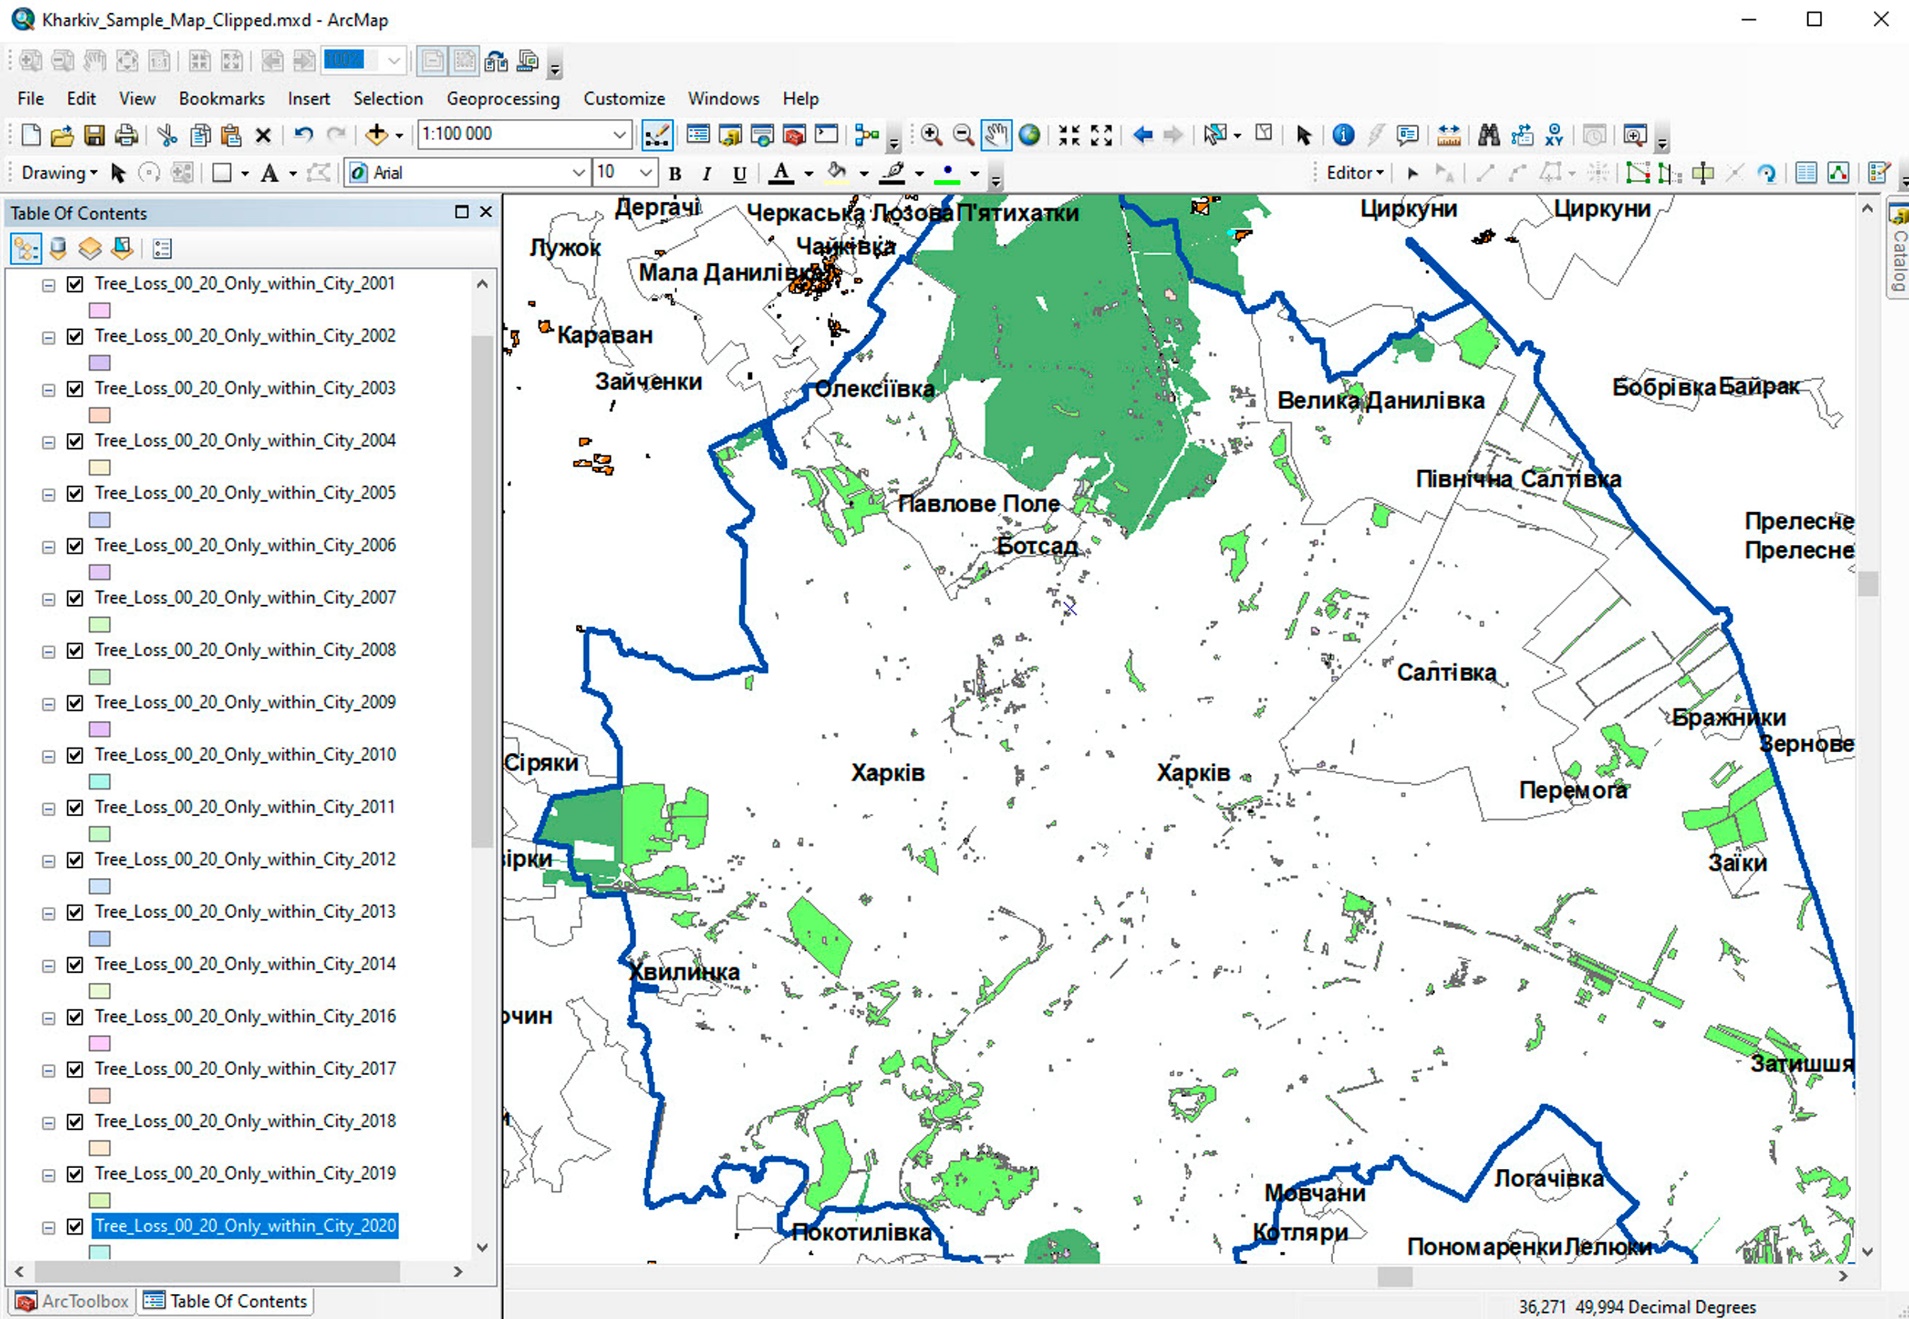


**Supplementary Figure 9.** The USL layer was partitioned for 21 layers on the base of 21 selection sets of the *Year* attribute (GDK-2)


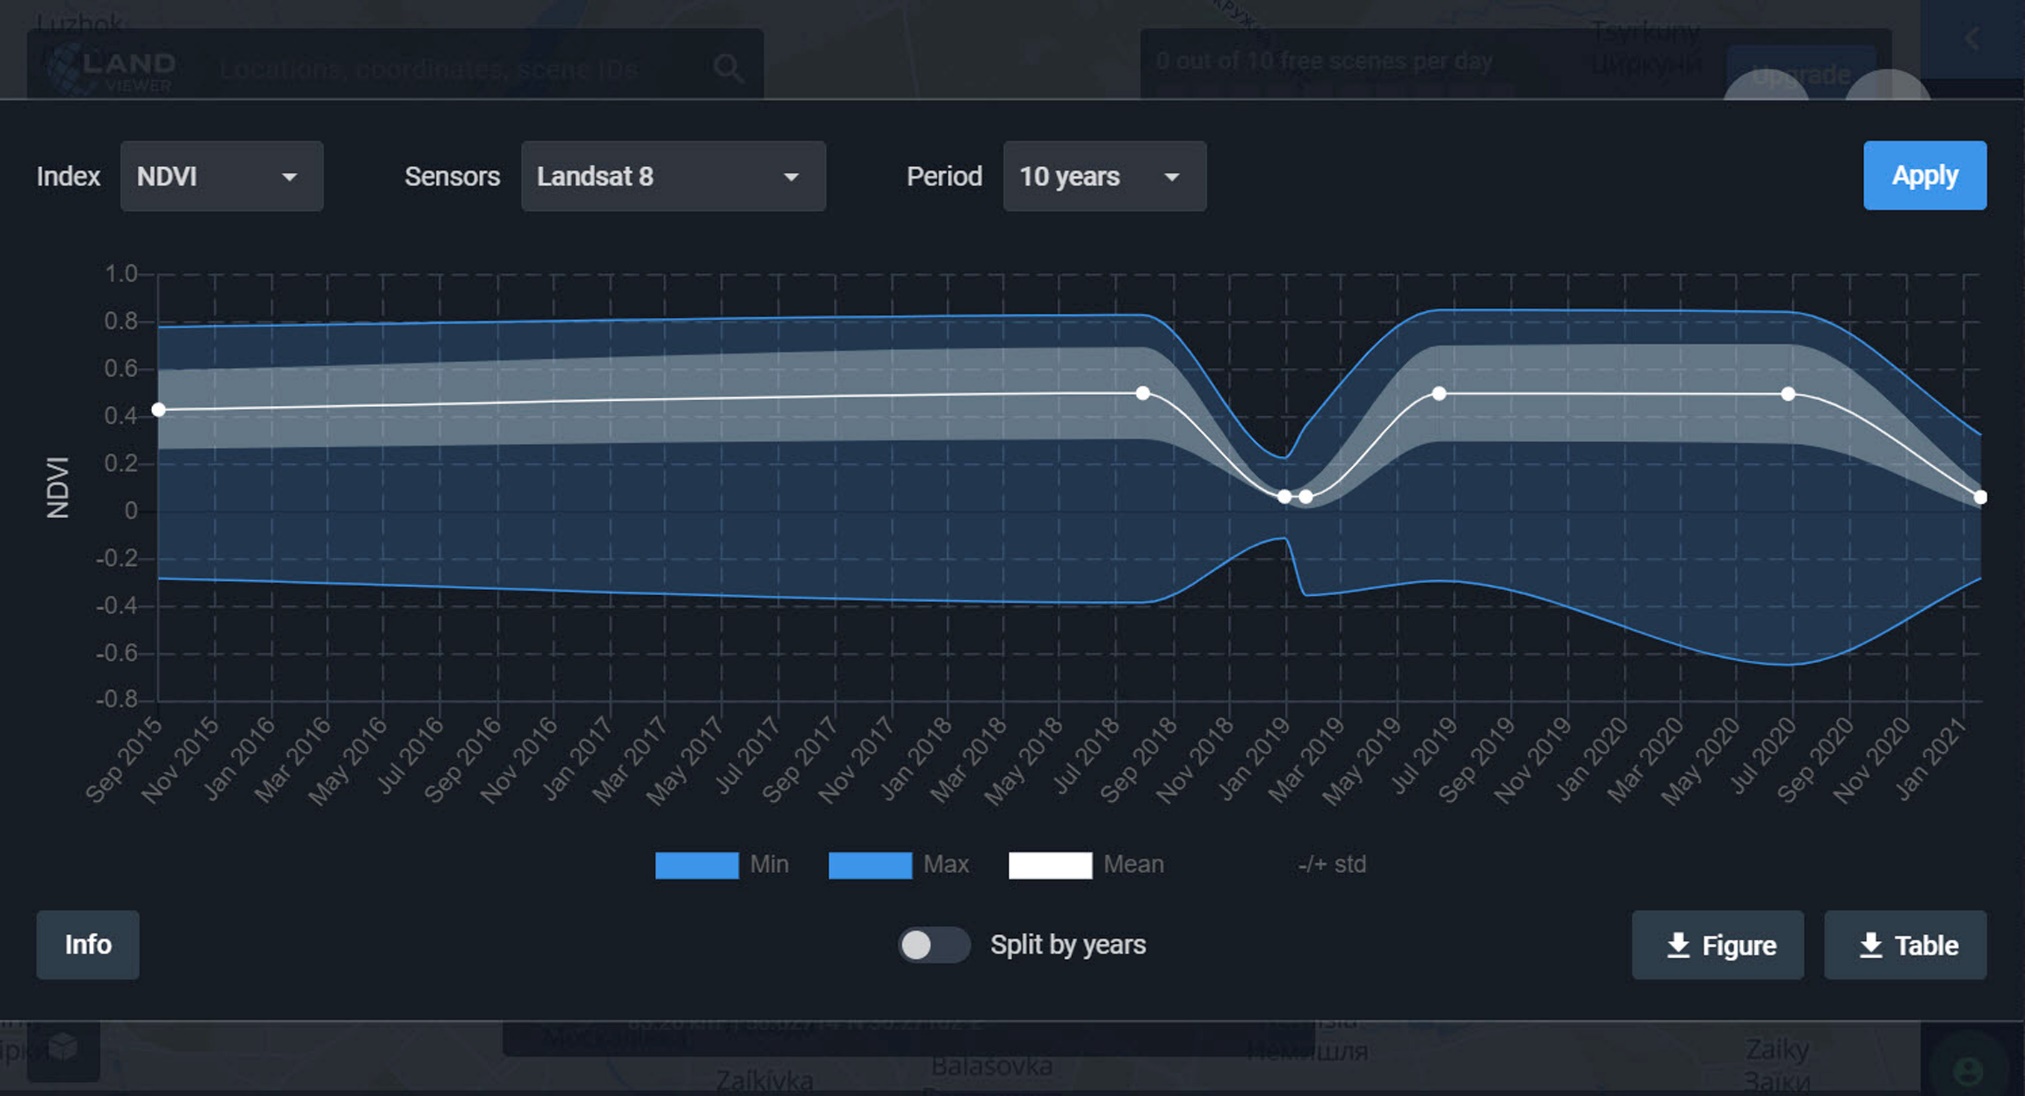


**Supplementary Figure 10**. The aggregated NDVI progress schedule in *July 2015 -July 2020* for the northern part (**Supplementary Figure 6**) of Kharkiv urban area. The graph is presented in the *LandViewer* image browser interface


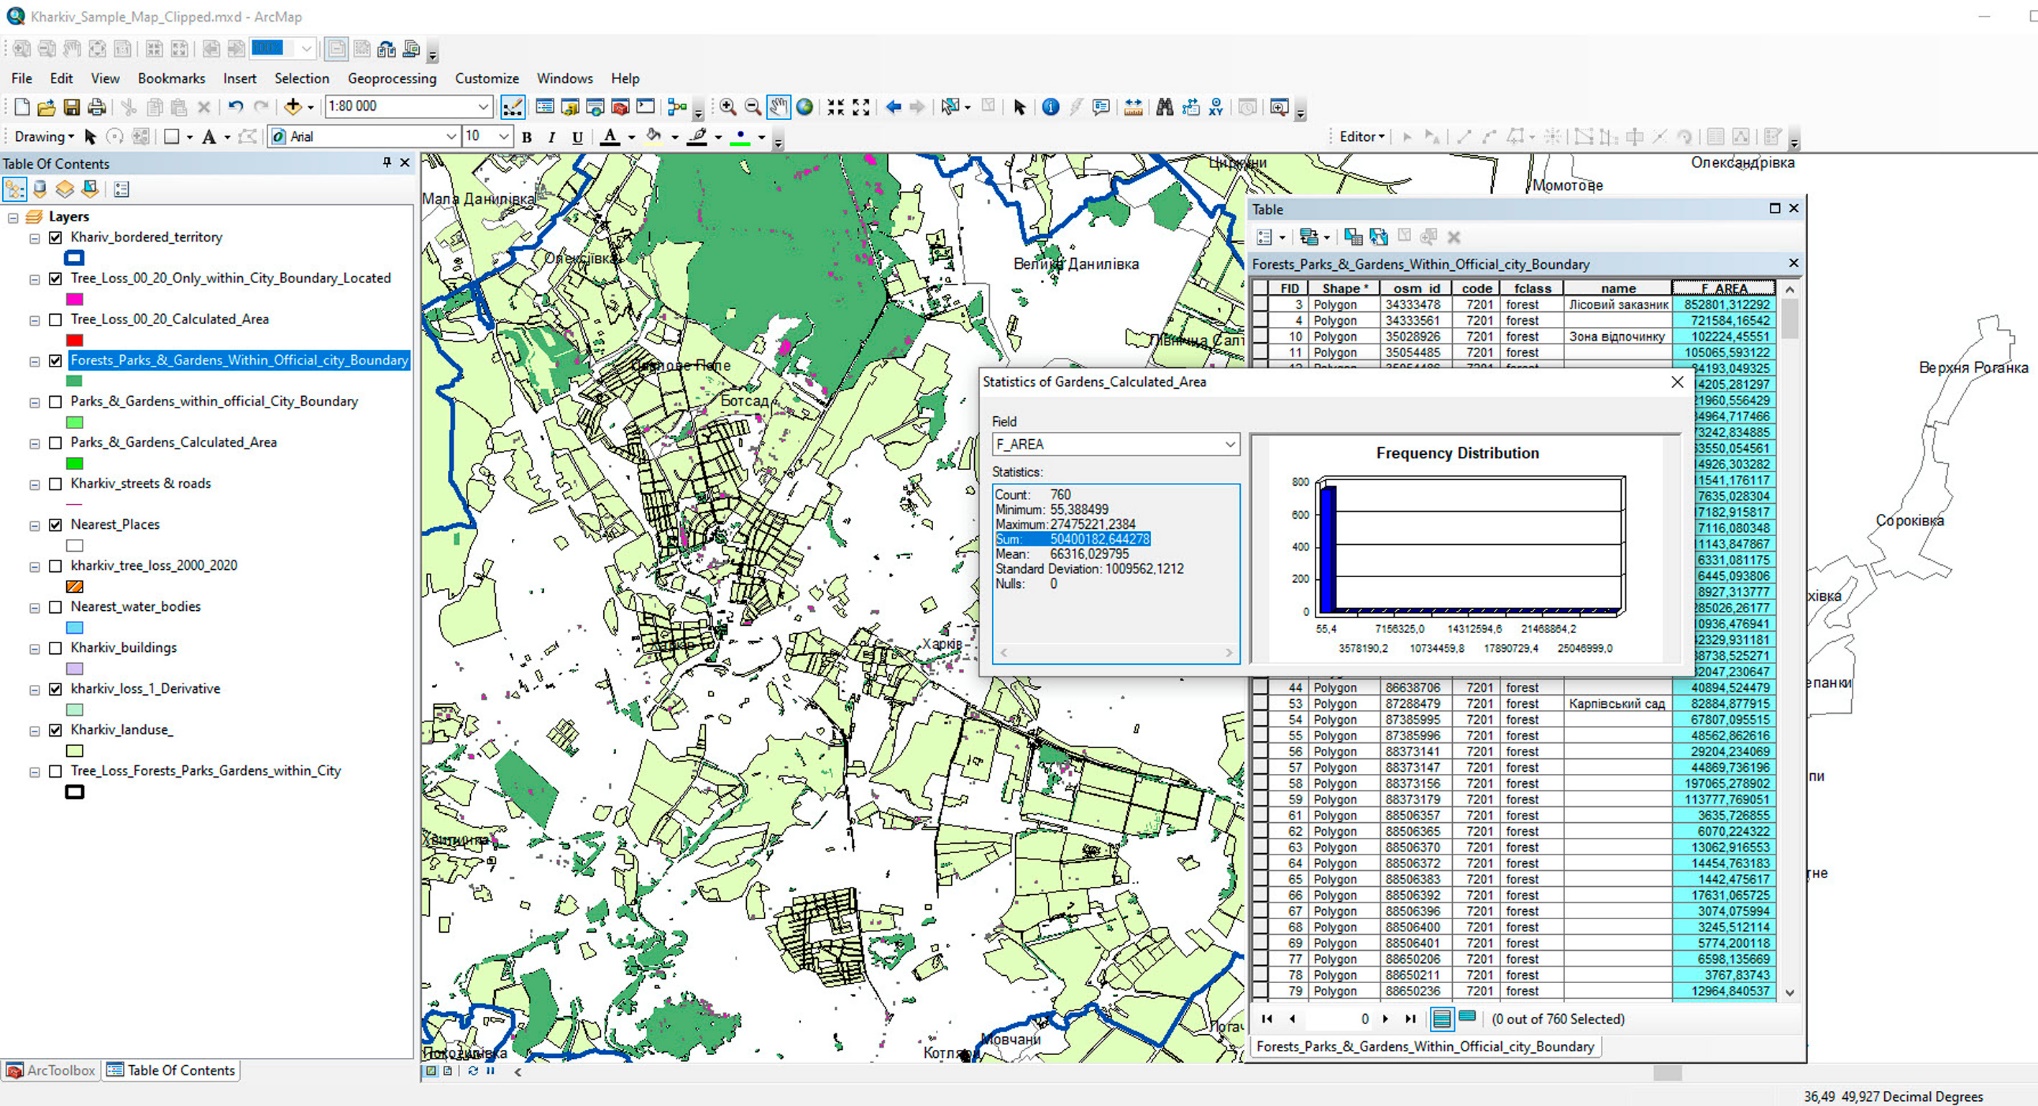


**Supplementary** **Figure 11.** Calculated areas of *5040 ha* due to the total UGAs in Kharkiv including urban forests, parks, gardens, and other green classes (GDK-2)


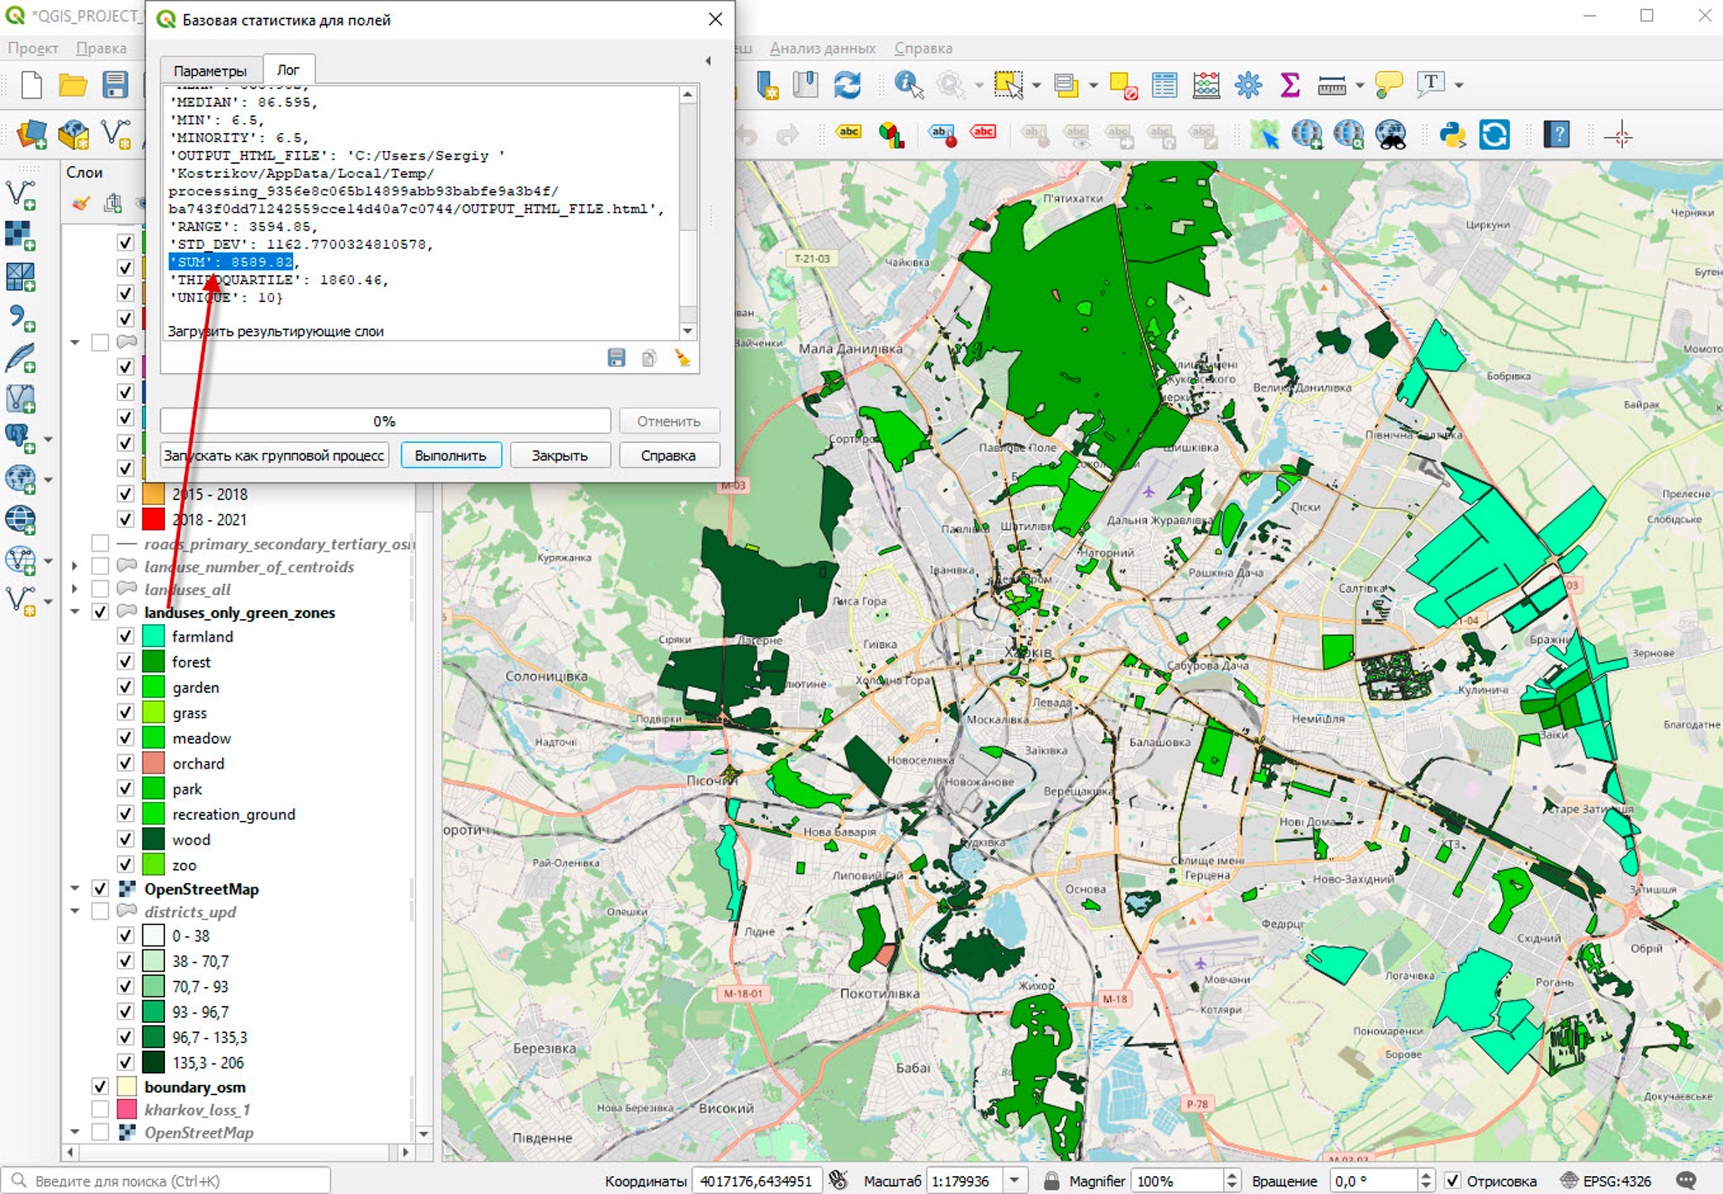


**Supplementary Figure 12.** A total area of the UGAs (with tree stand and without it) in Kharkiv calculated on the base of OSM sources - *8589 ha* (GDK-1)


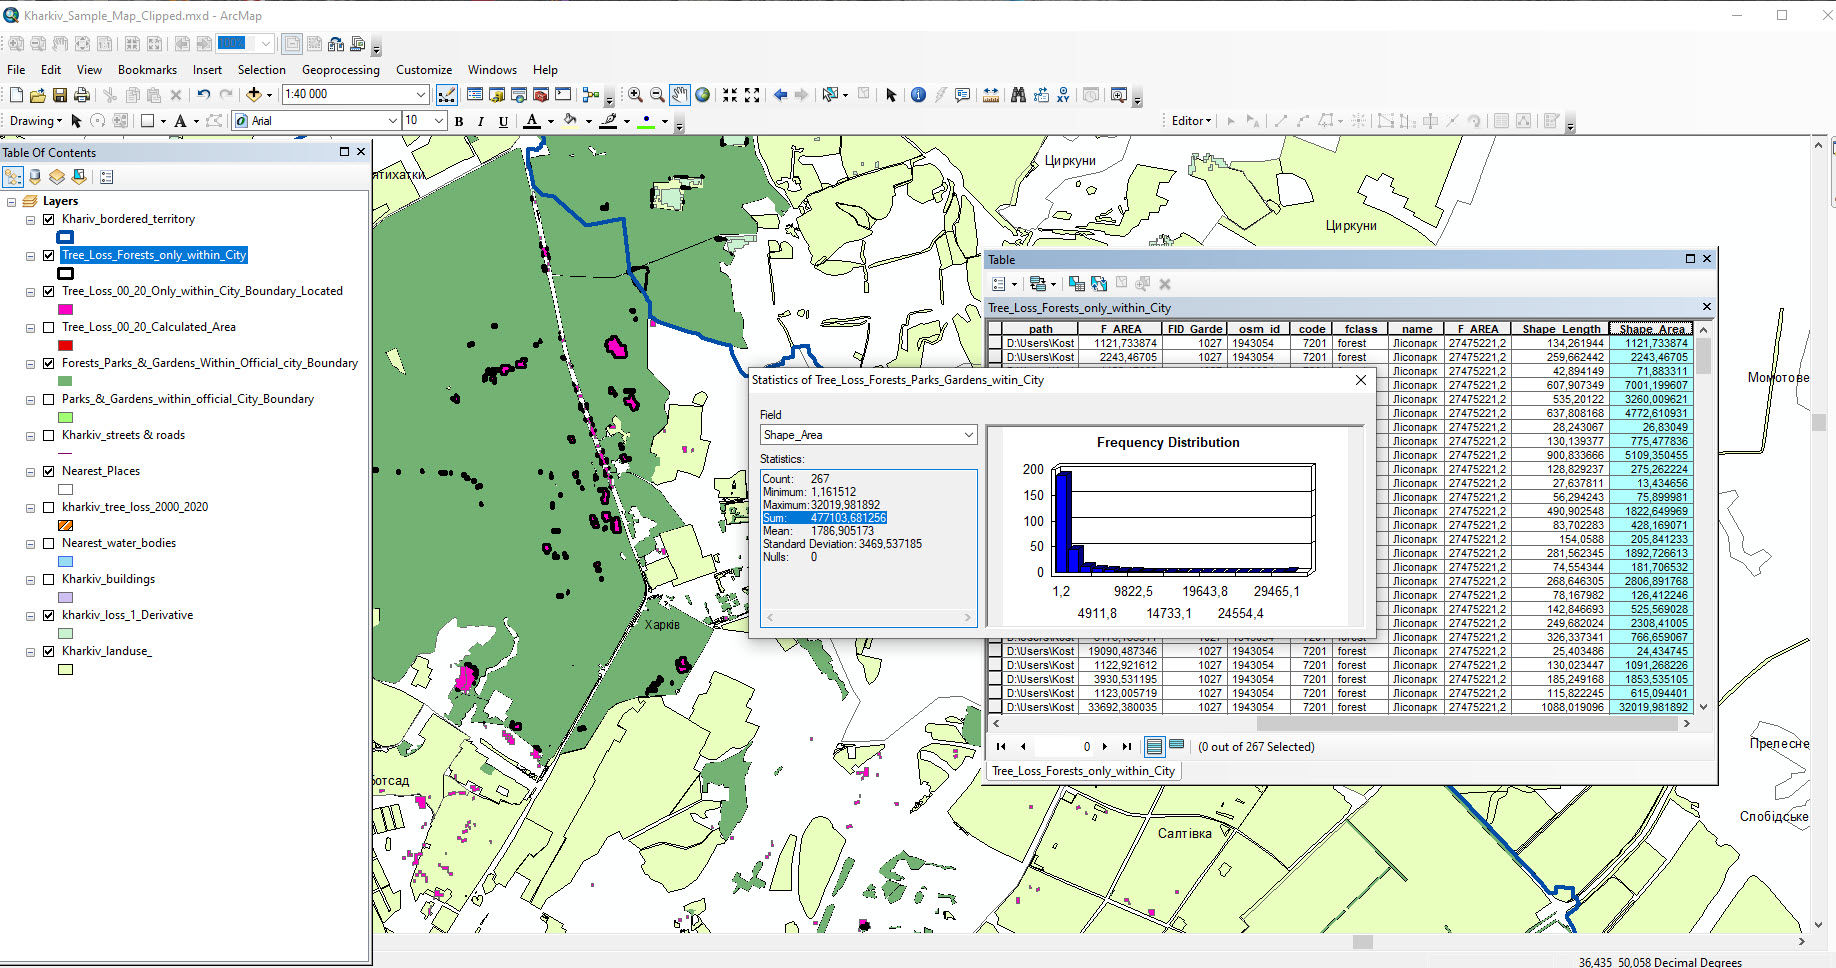


**Supplementary Figure 13.** Calculated areas of *48 ha* due to thetotal USL values within the city in urban forests only (GDK-2)


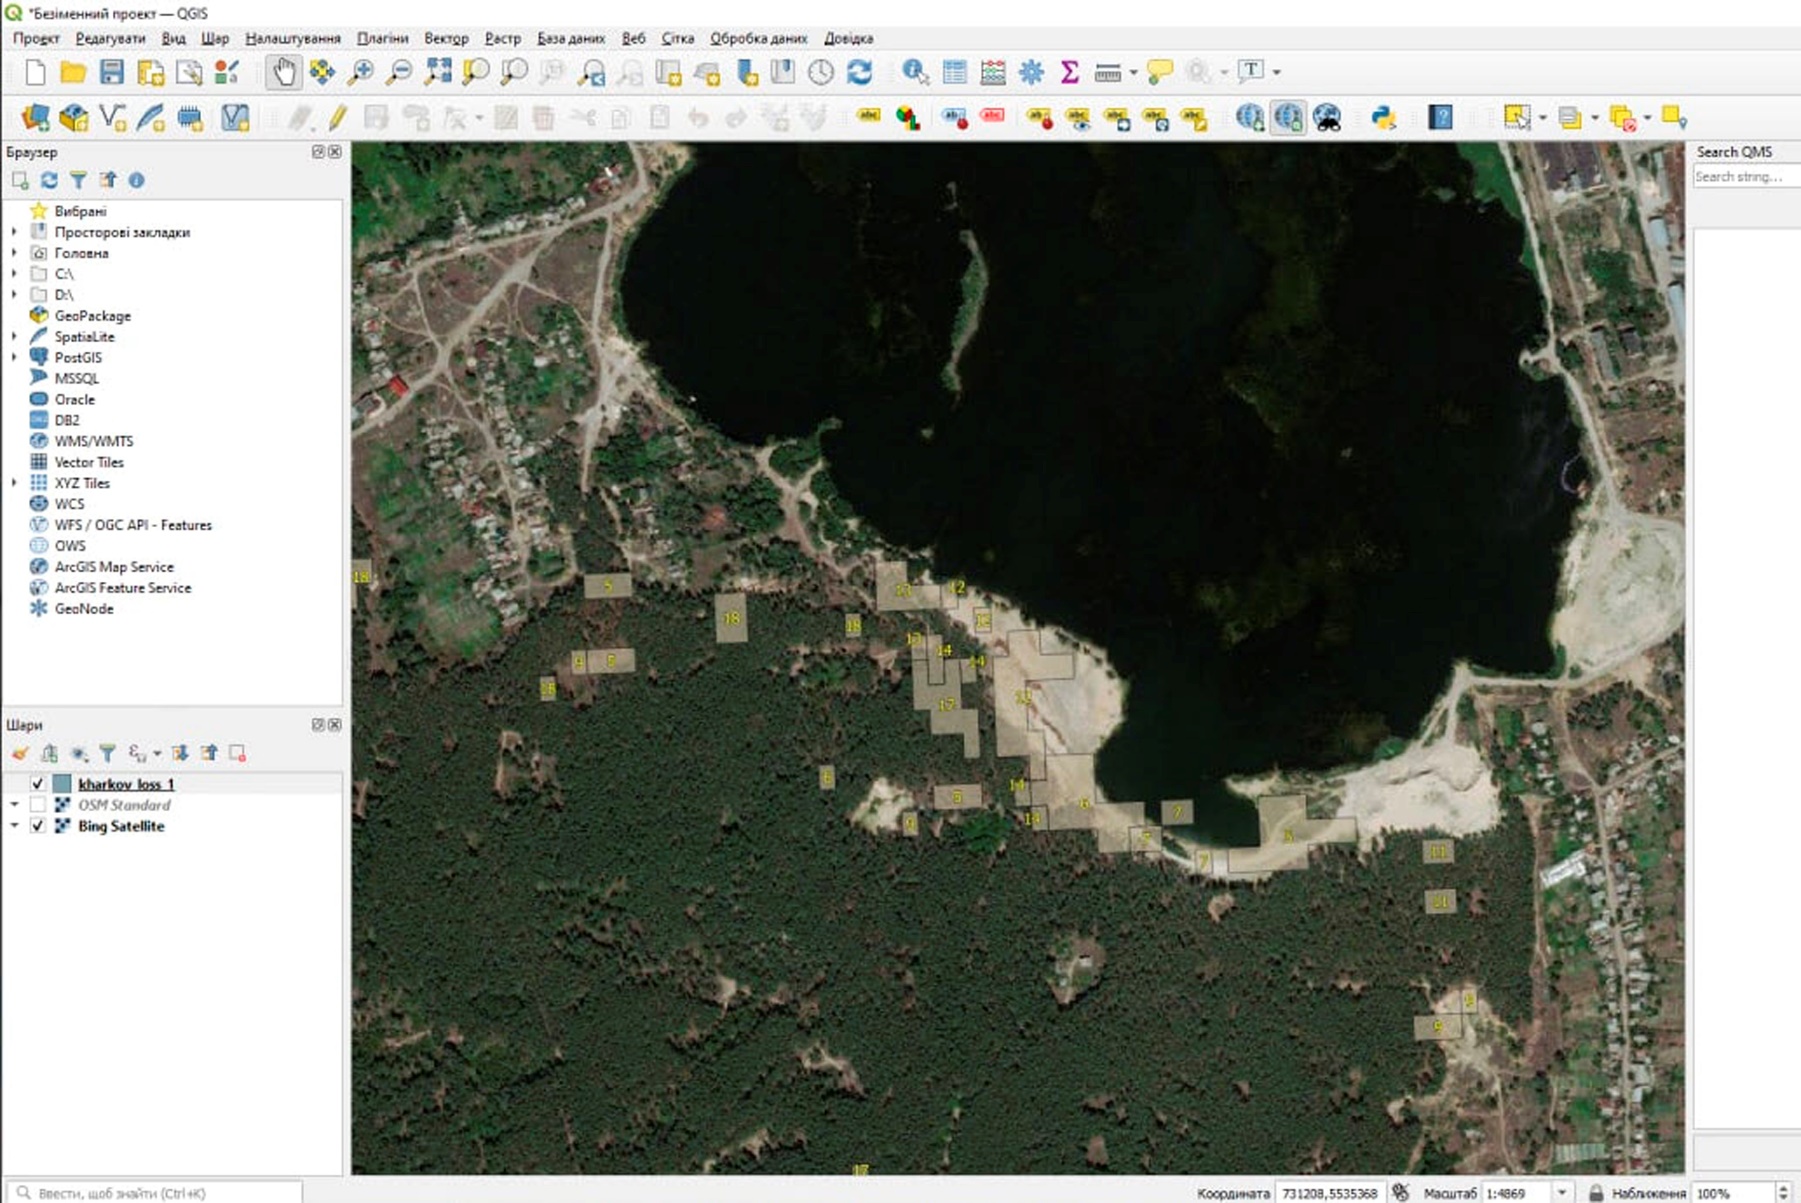


**Supplementary Figure 14**. Construction of a building material factory on an urban lake bank with a huge sandpit built in the former urban forest. Several USL vector polygons as the results of 1.5 block unit (**Figure 2**) market in that visual by yellow digits – identifiers of these polygons. The southern-western part of the AOI of our study.


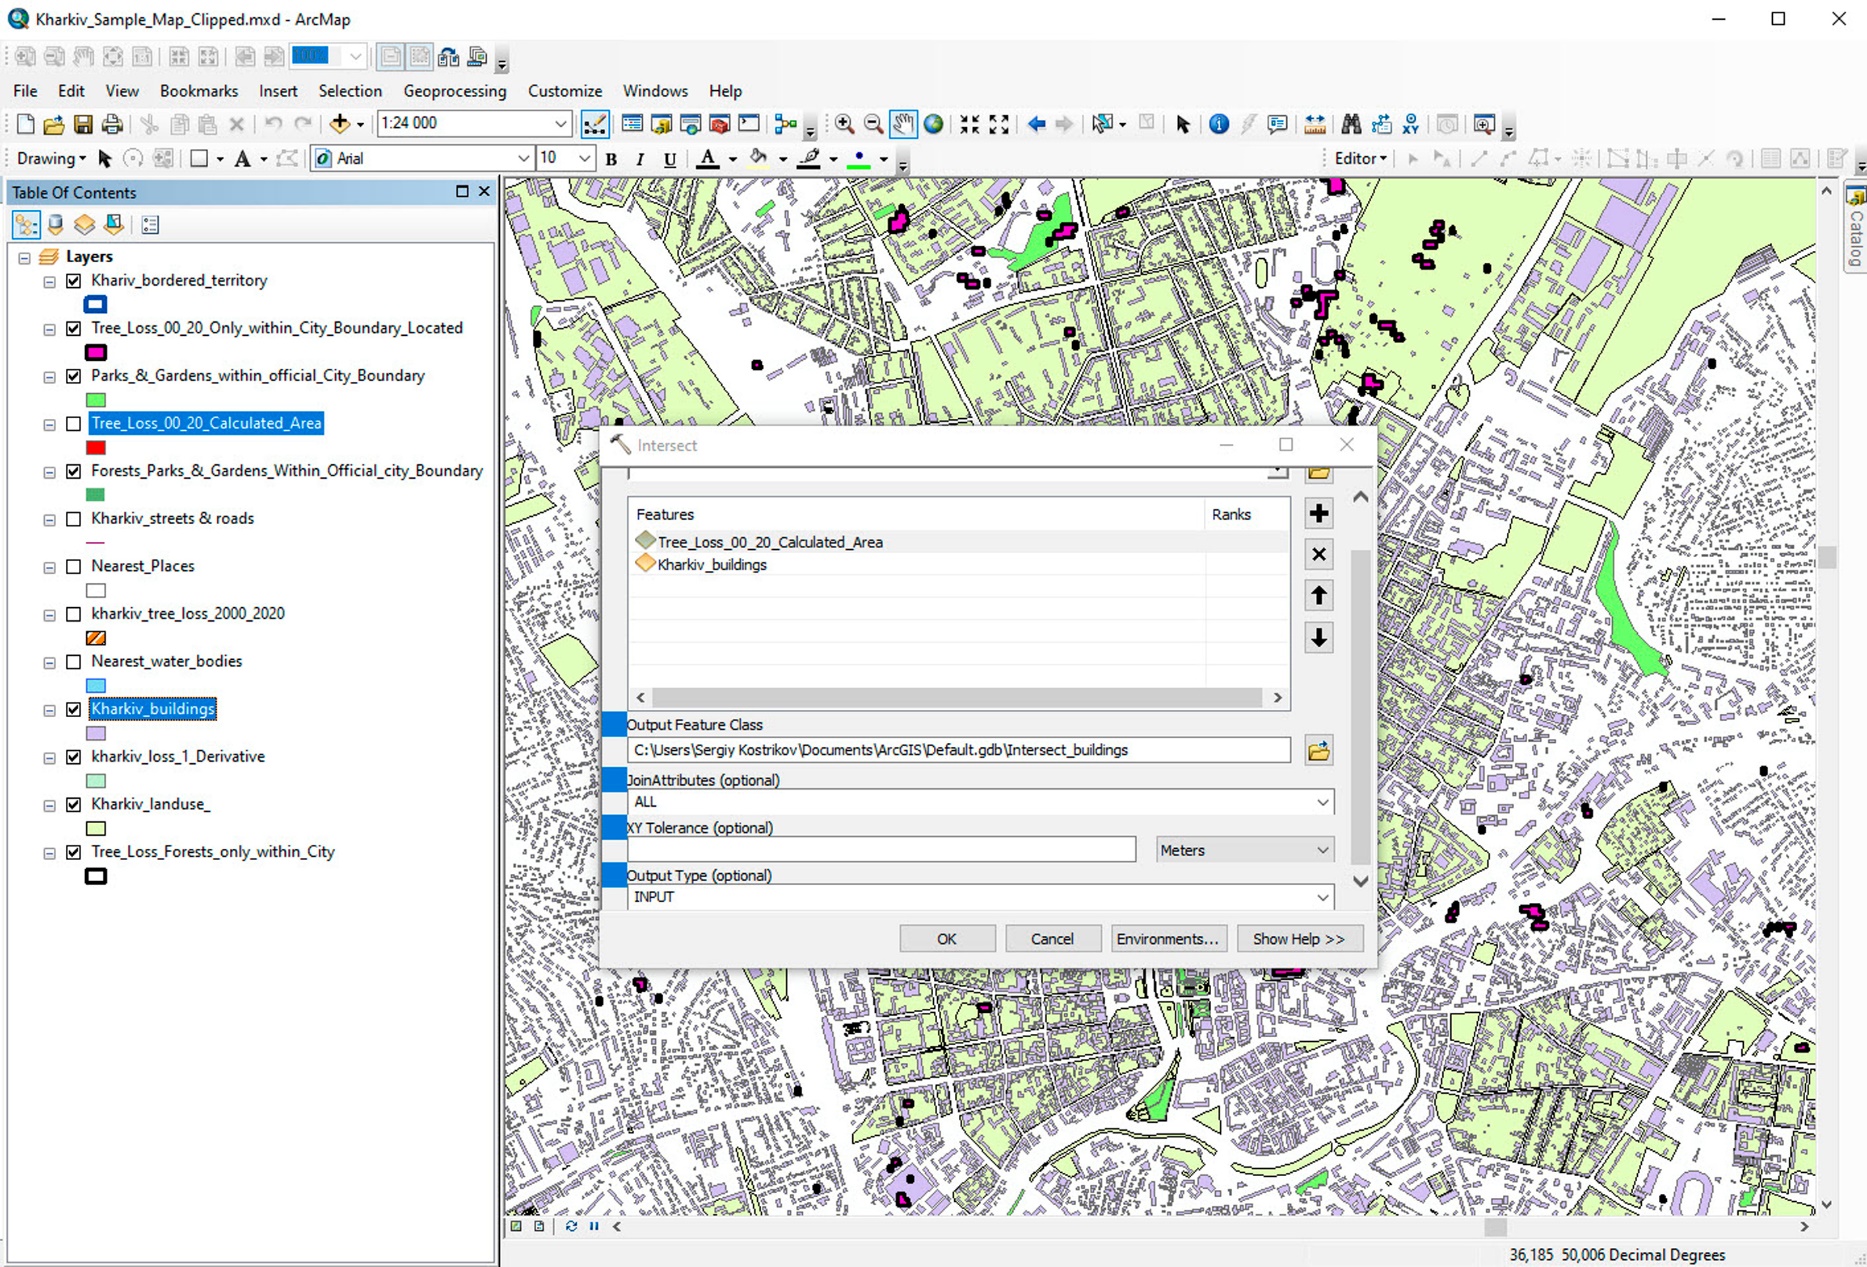


**Supplementary Figure 15**. Application of the Overlay Analysis *Intersect* tool (a geometric intersection of the aggregated USL layer with the *Buildings* layer as with the input feature class) (GDK-2)


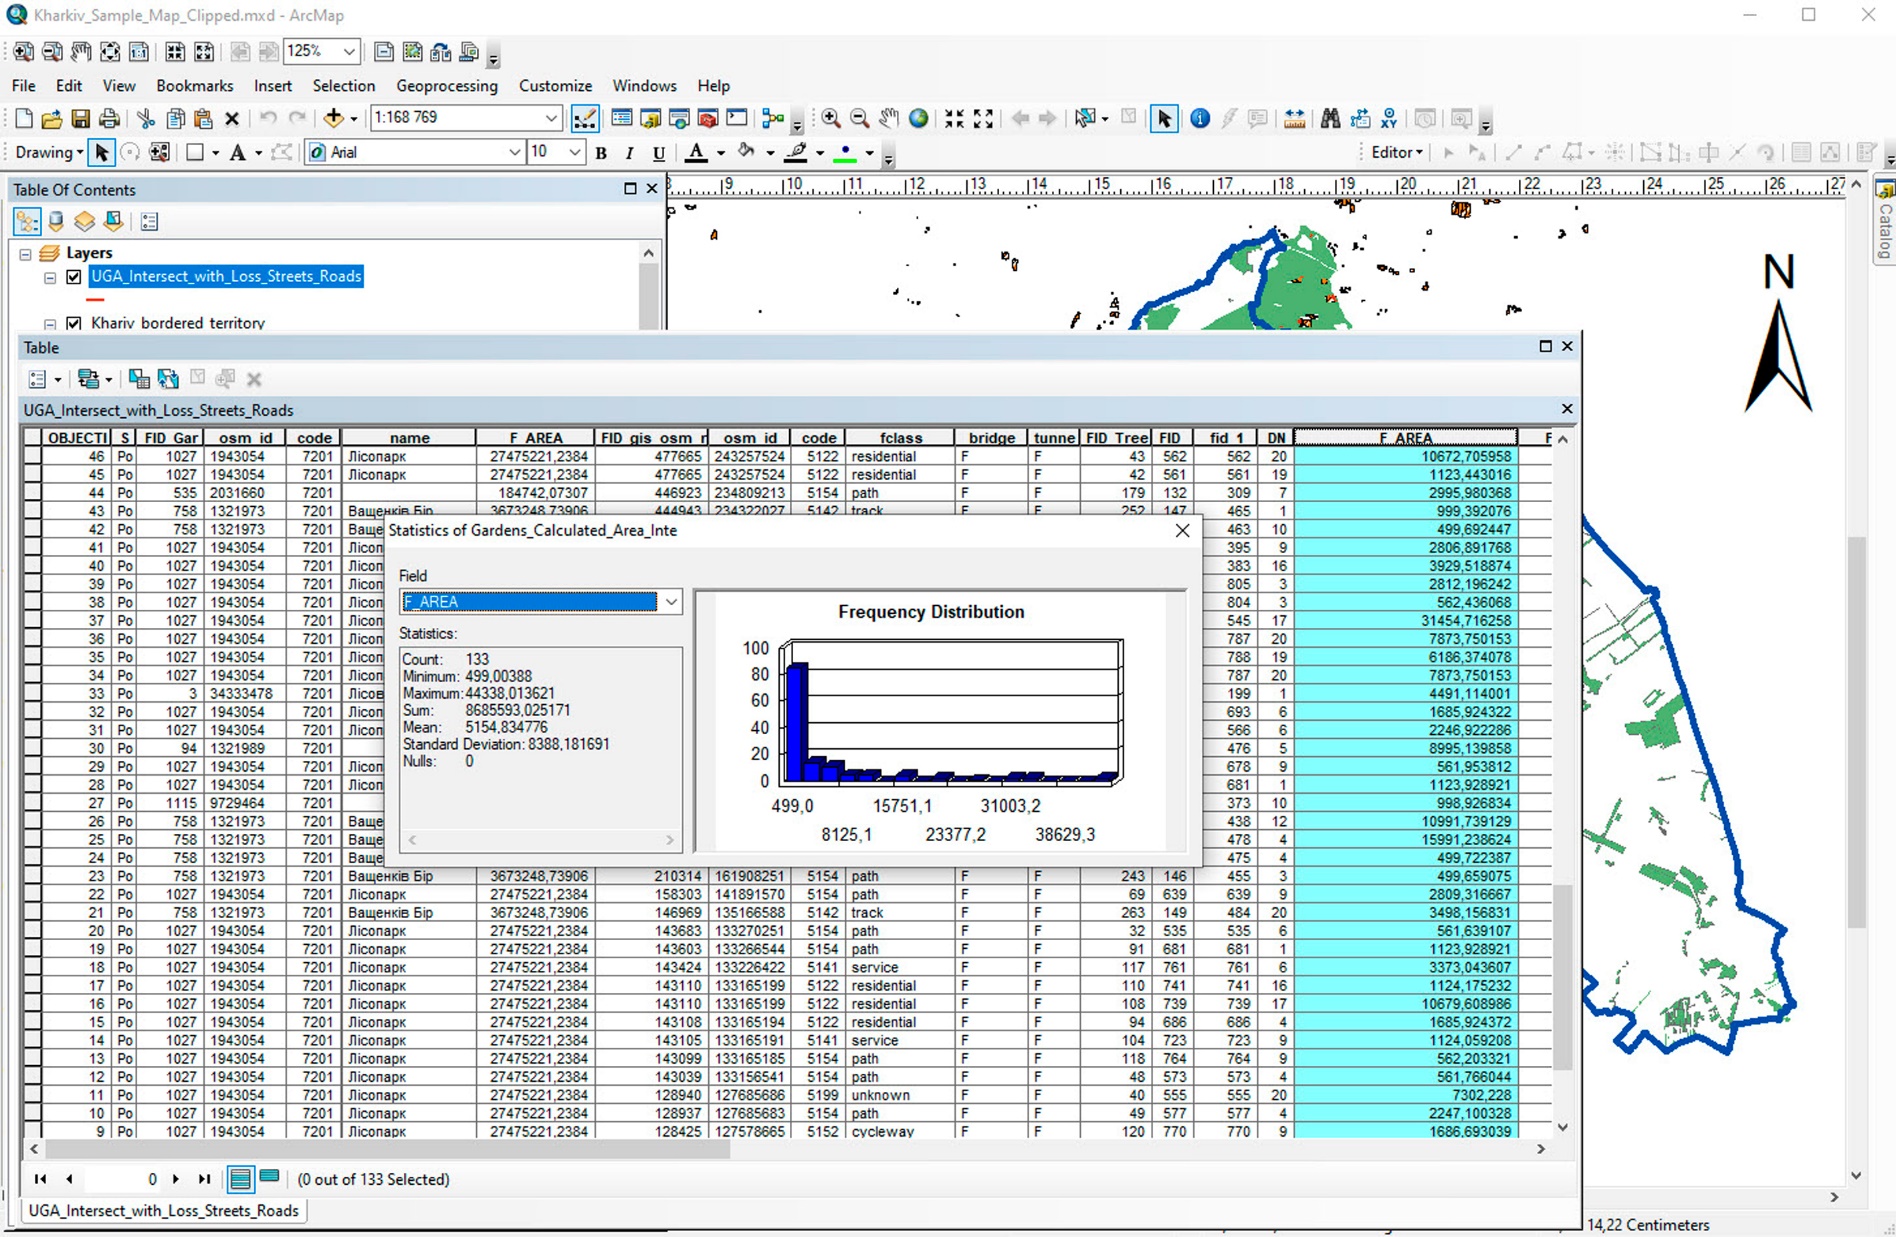


**Supplementary Figure 16**. The result of intersection of the USL layer with the *Streets* and *Roads* layers reported an overlapped area of *86 ha* (GDK-2)


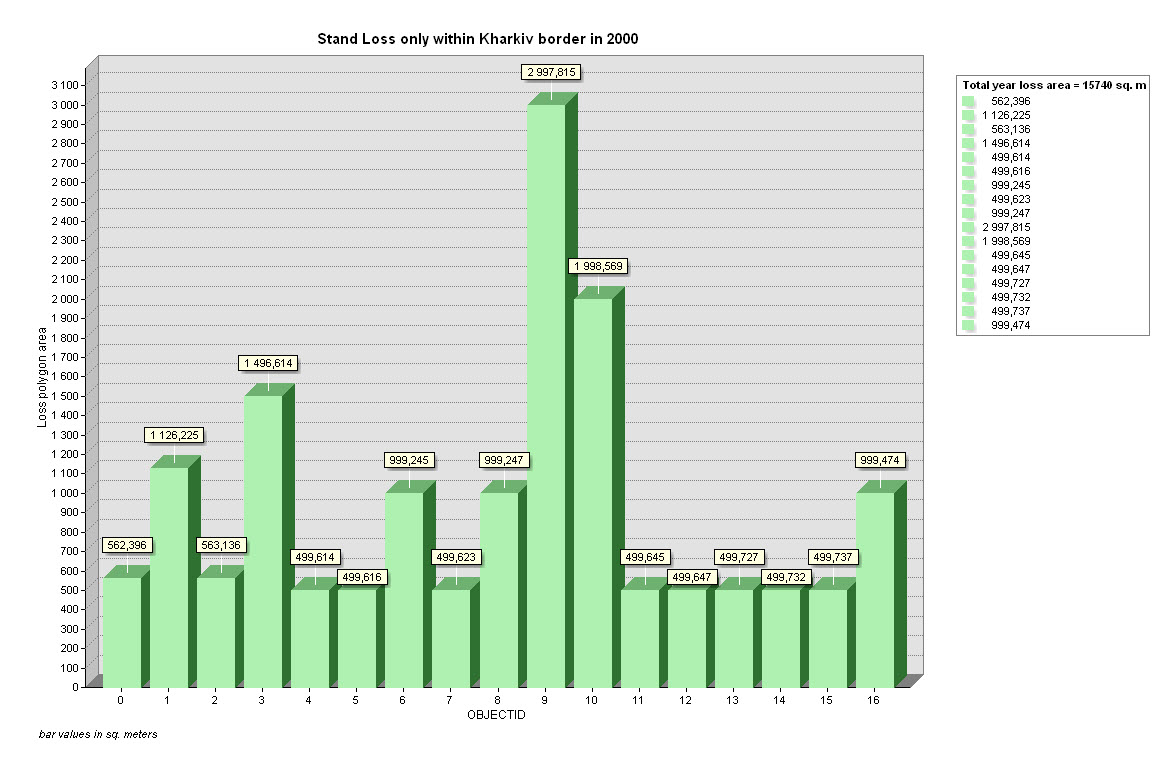


**A**

**
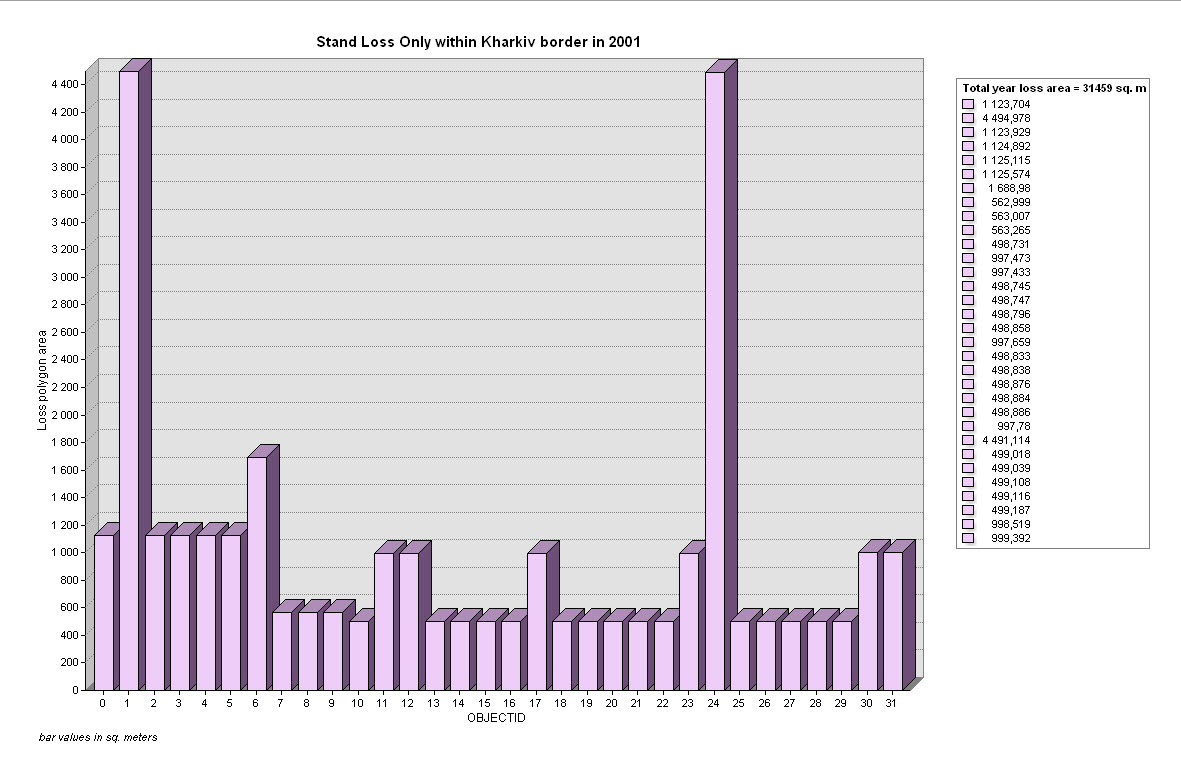
**

**B**

**Supplementary Figure 17**. Vector polygon areas of USL distributions per a Year: **A –** 2000; **B –** 2001. A *Graph View* in the *ArcGIS* interface (GDK-2)

**
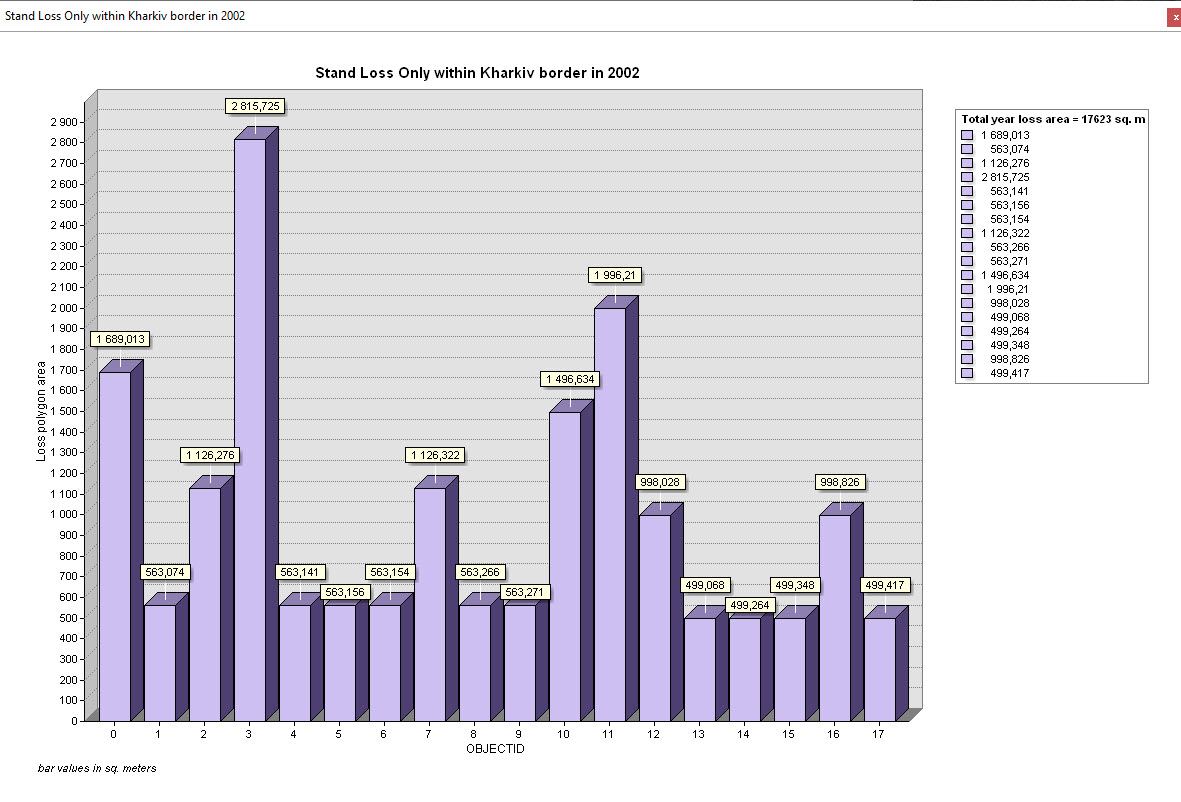
**

**C**

**
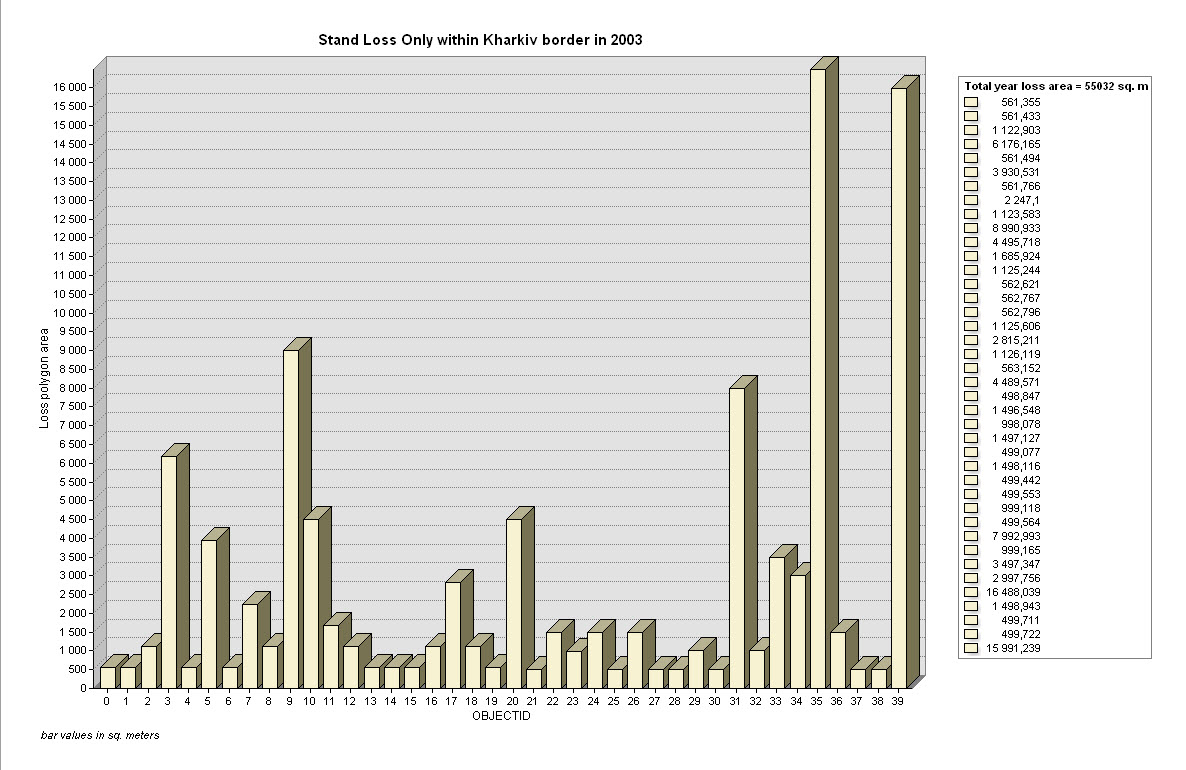
**

**D**

**Supplementary Figure 17**. Vector polygon areas of USL distributions per a Year: **C –** 2002; **D –** 2003. A *Graph View* in the *ArcGIS* interface (GDK-2)


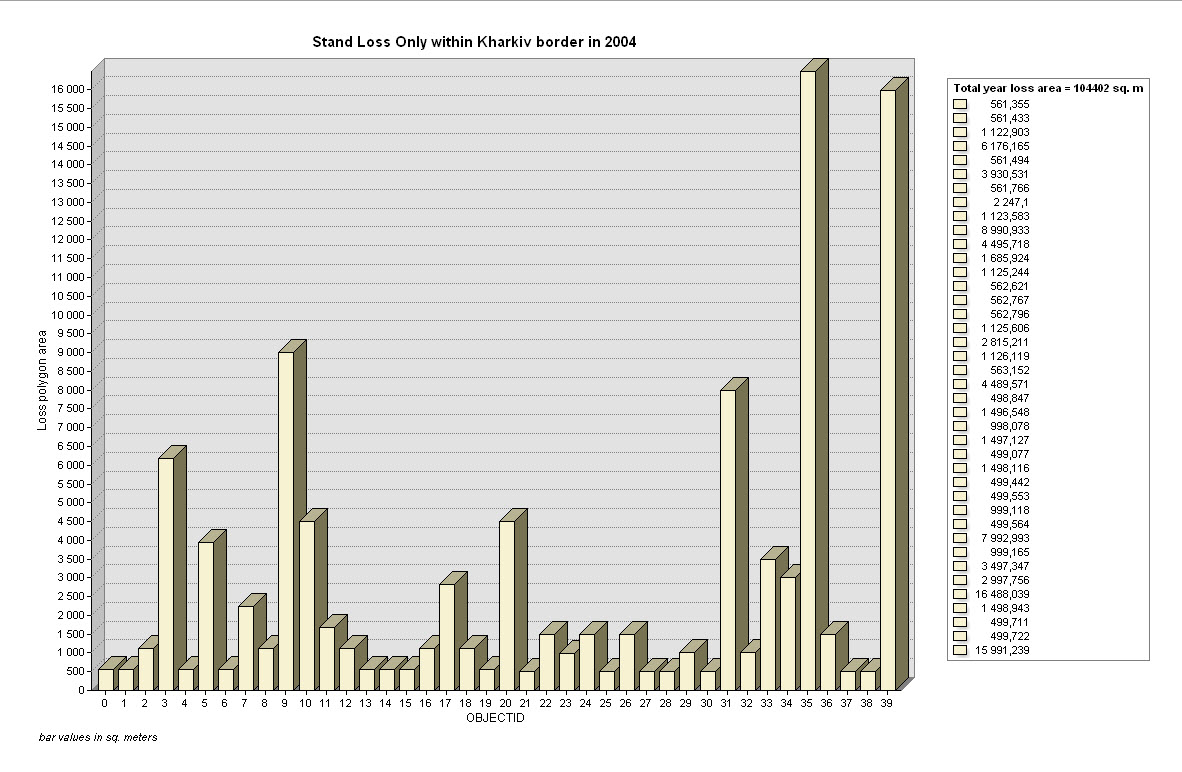


**E**

**
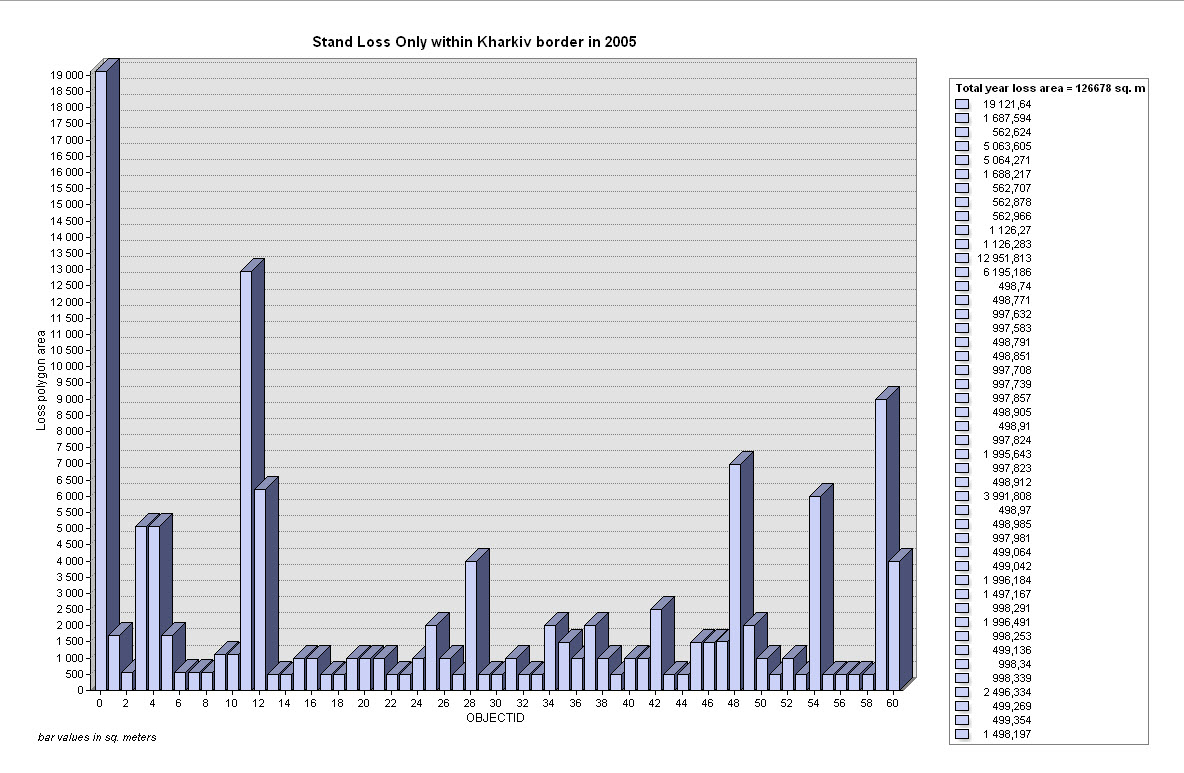
**

**F**

**Supplementary Figure 17**. Vector polygon areas of USL distributions per a Year: **E –** 2004; **F –** 2005. A *Graph View* in the *ArcGIS* interface (GDK-2)

**
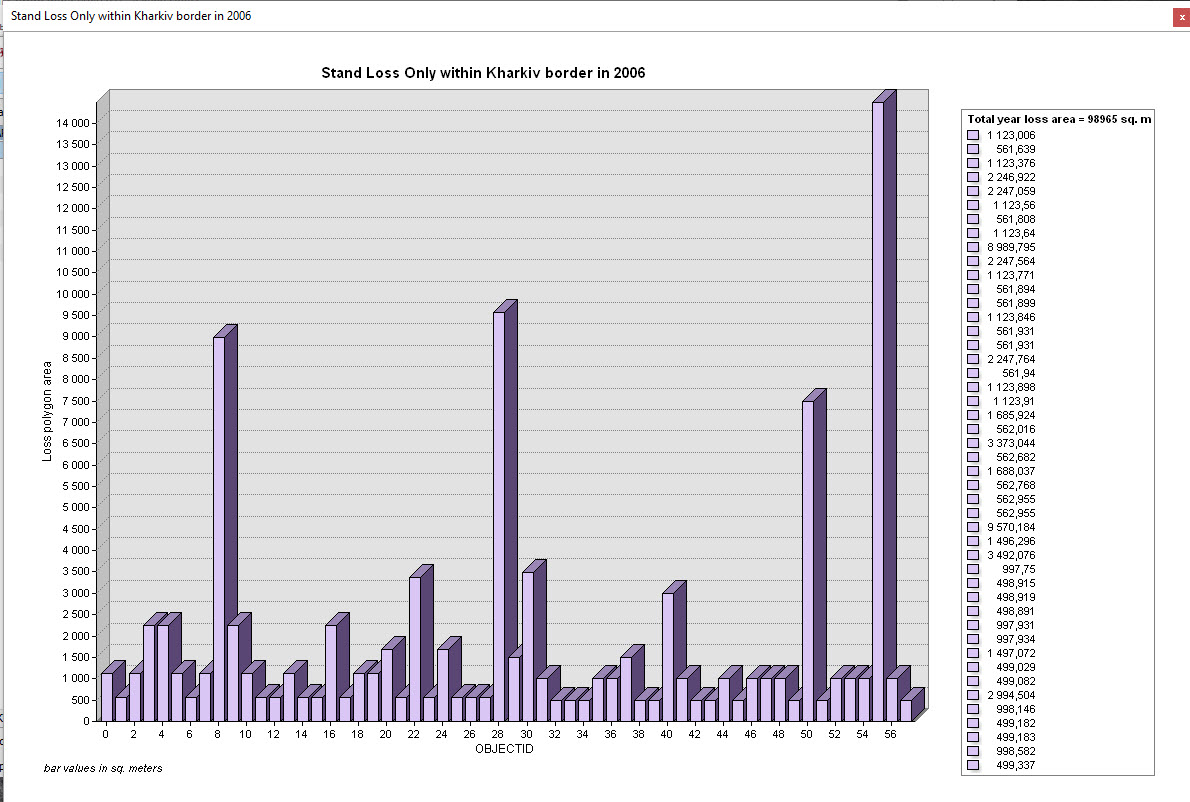
**

**G**

**
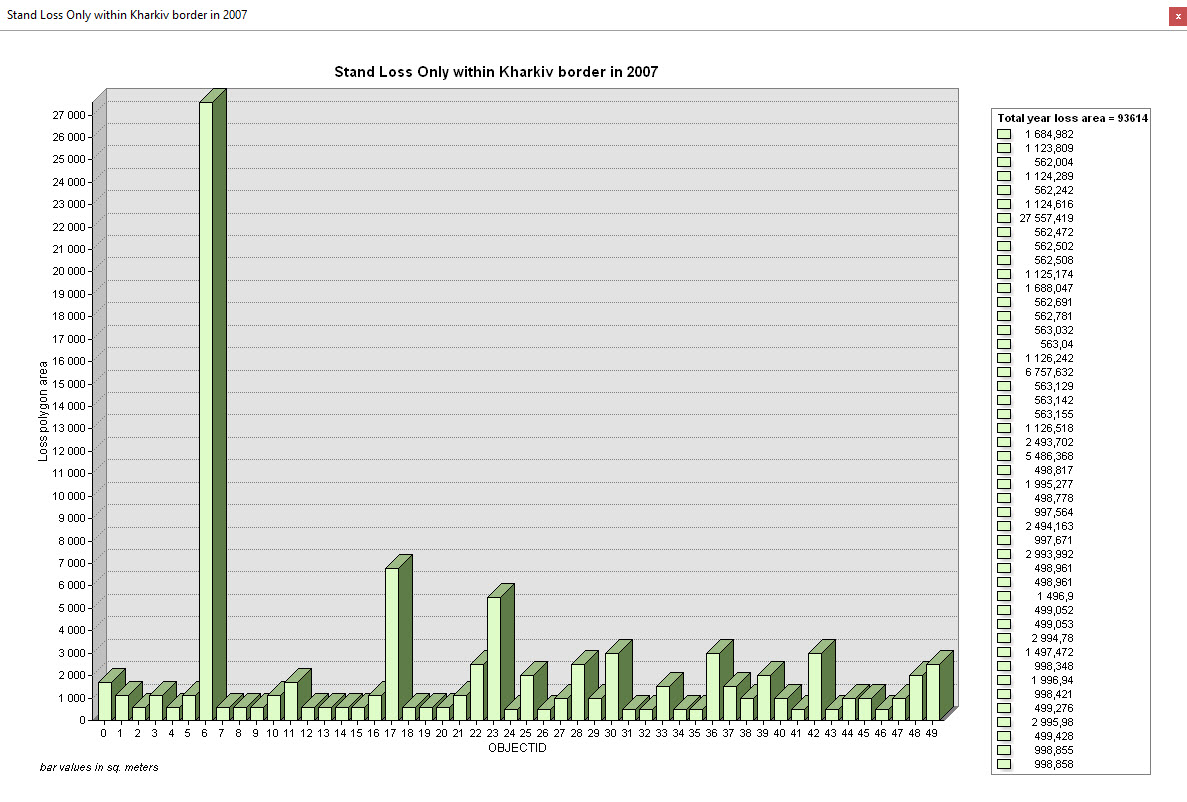
**

**H**

**Supplementary Figure 17**. Vector polygon areas of USL distributions per a Year: **G –** 2006; **H –** 2007. A *Graph View* in the *ArcGIS* interface (GDK-2)

**
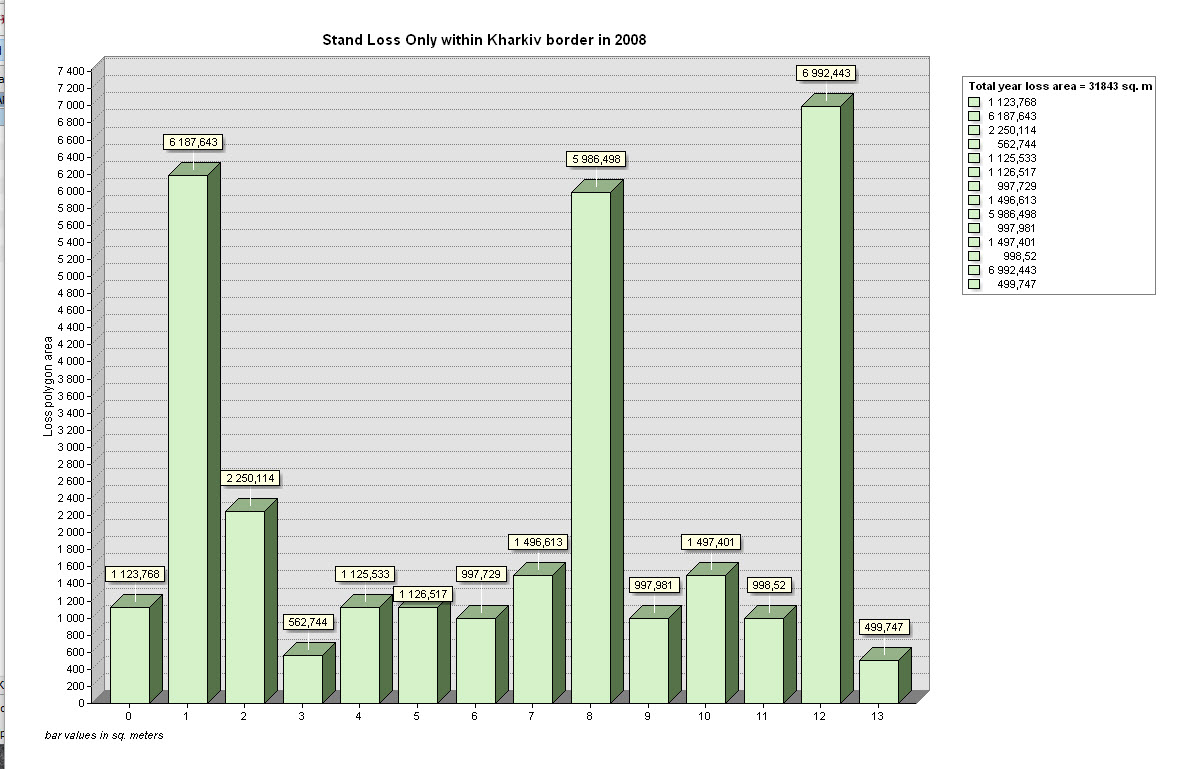
**

**I**

**
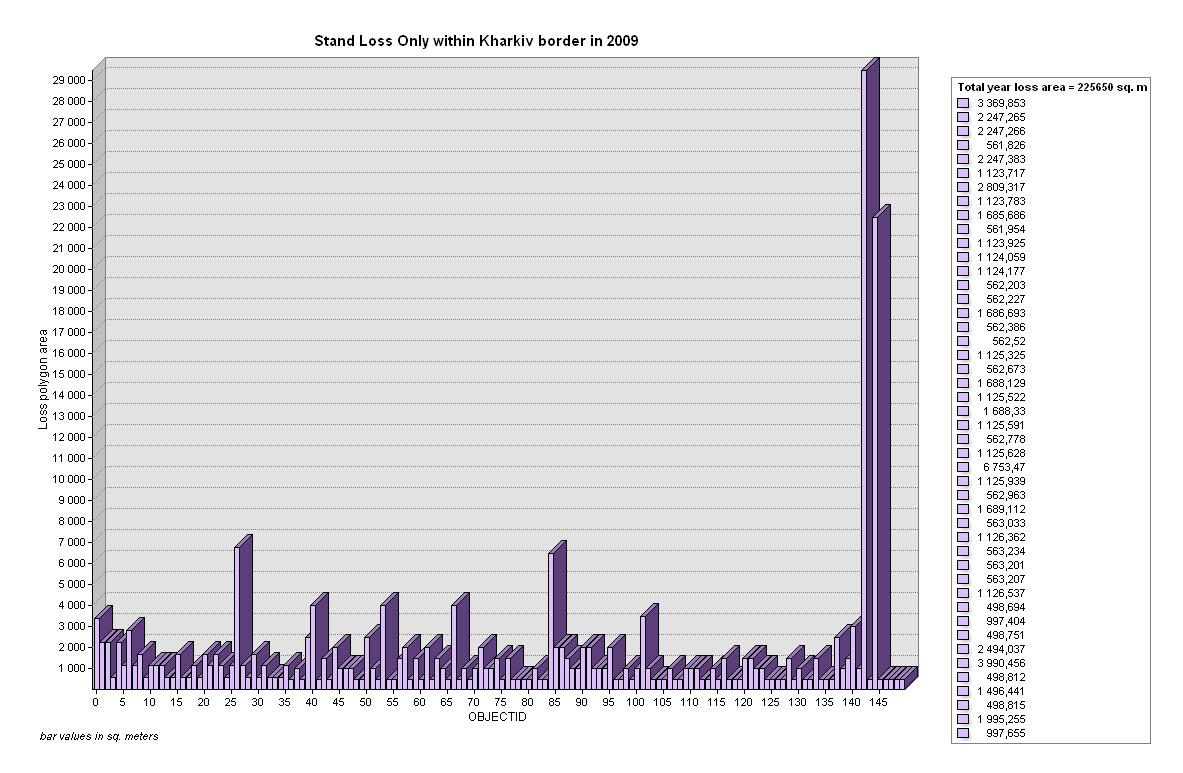
**

**J**

**Supplementary Figure 17**. Vector polygon areas of USL distributions per a Year: **I –** 2008; **J –** 2009. A *Graph View* in the *ArcGIS* interface (GDK-2)


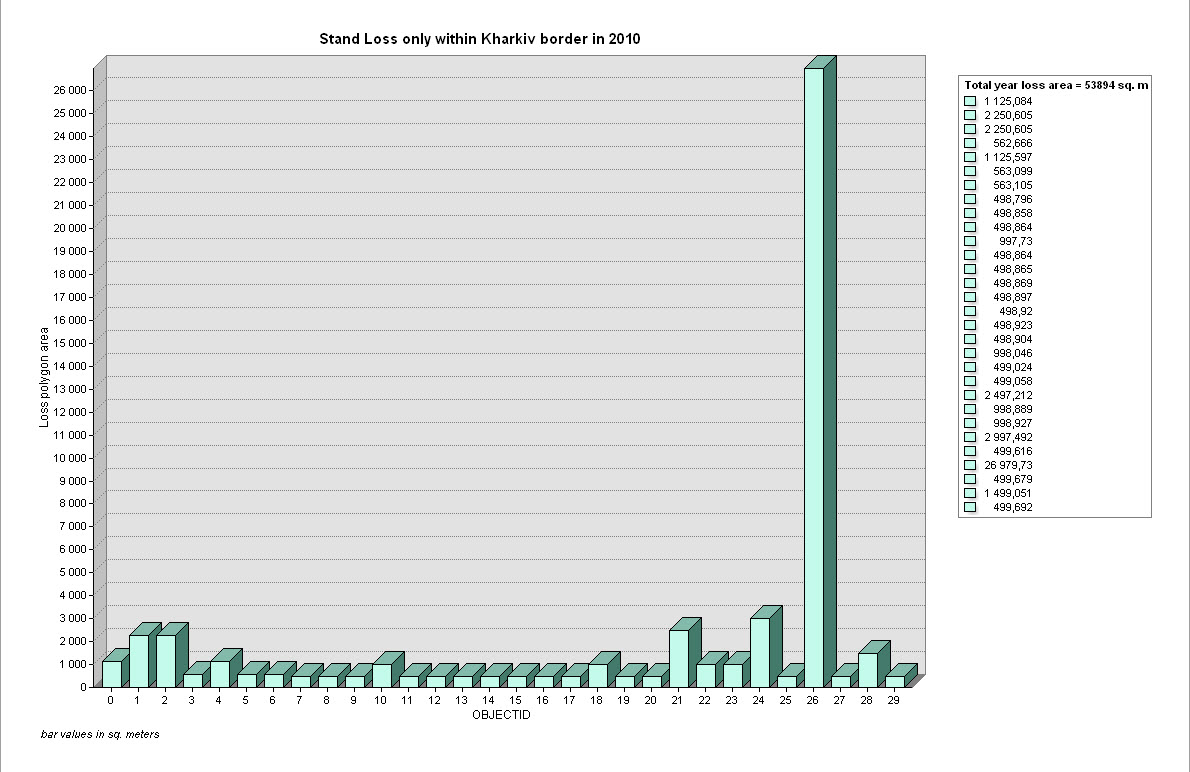


K


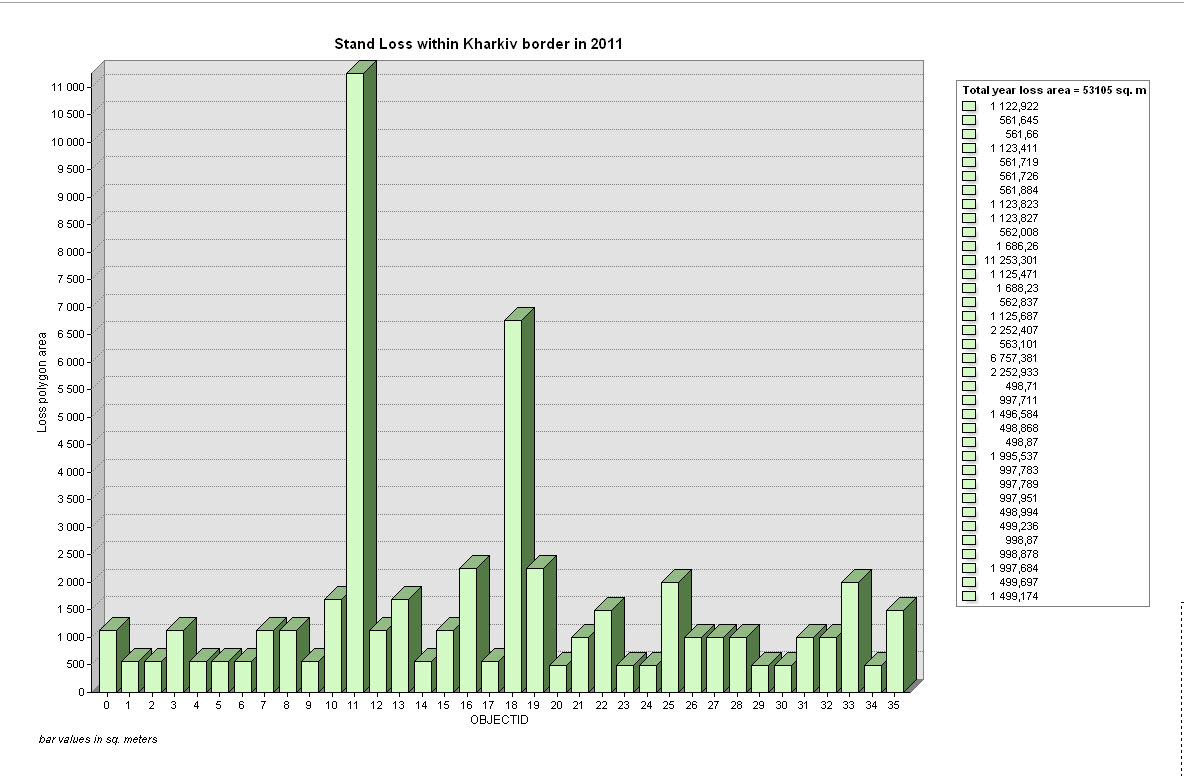


**L**

**Supplementary Figure 17**. Vector polygon areas of USL distributions per a Year: **K –** 2010; **L –** 2011. A *Graph View* in the *ArcGIS* interface (GDK-2)

**
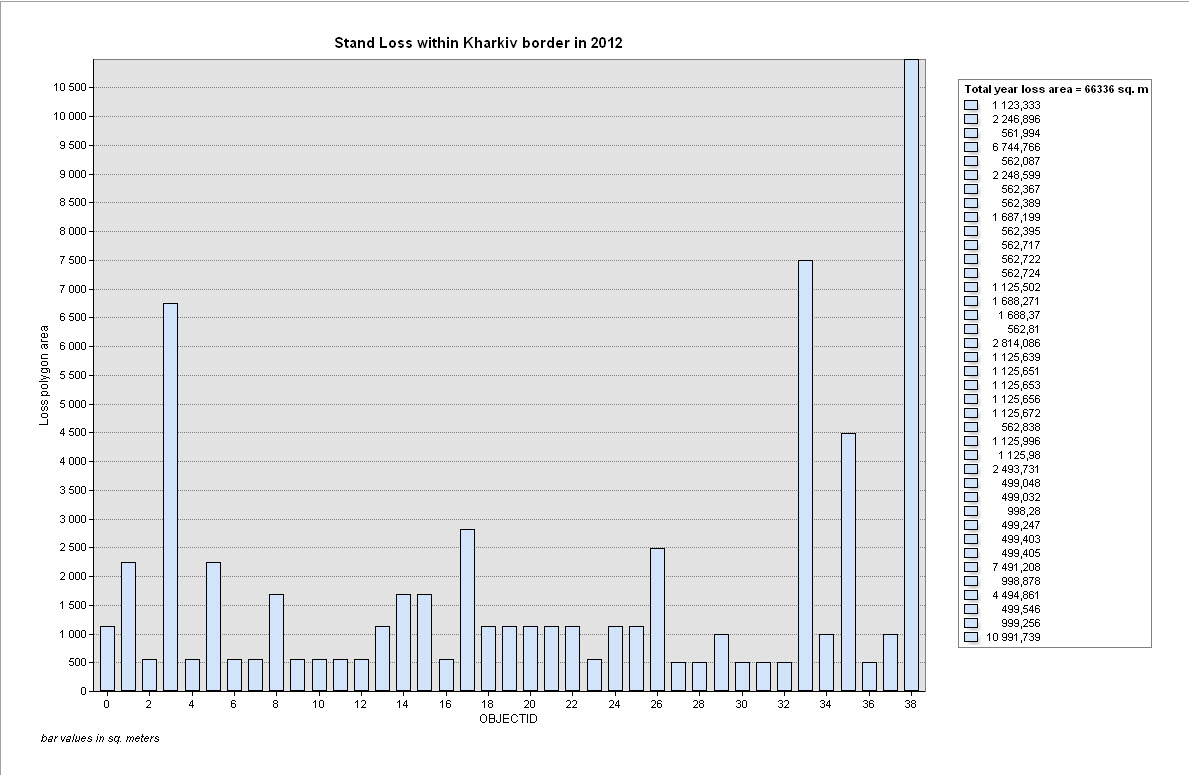
**

**M**

**
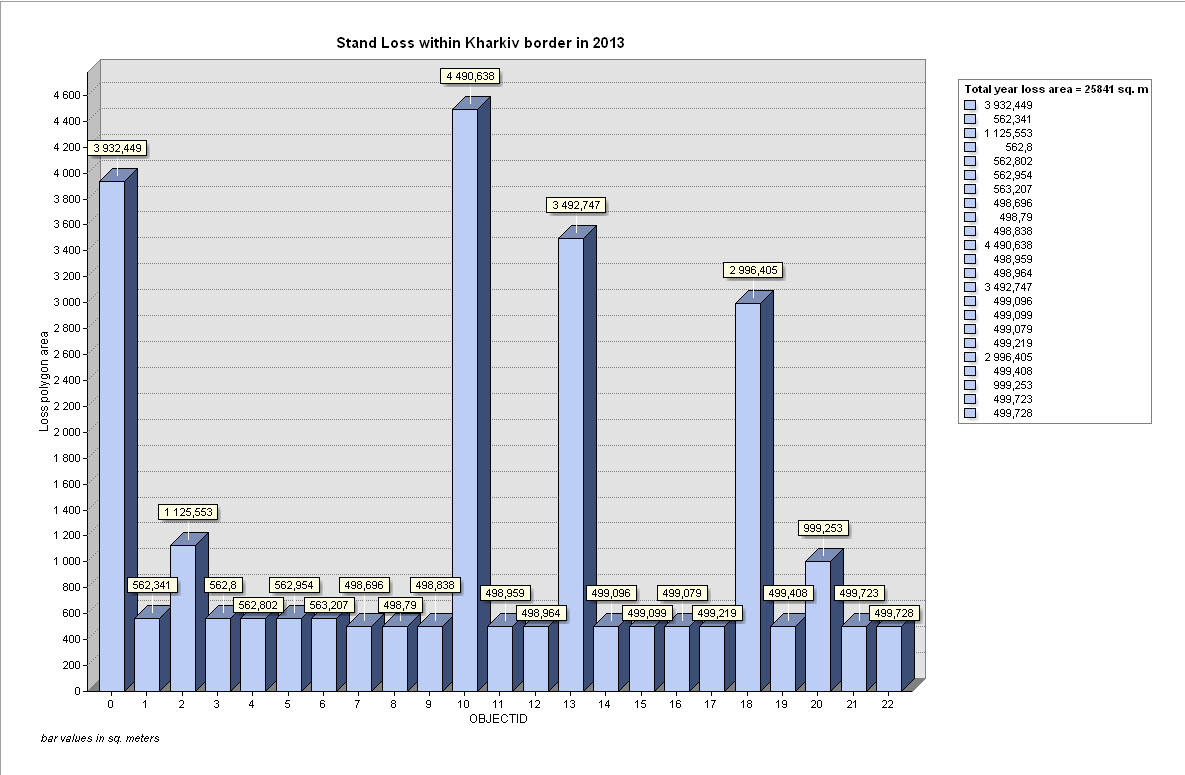
**

**N**

**Supplementary Figure 17**. Vector polygon areas of USL distributions per a Year: **M –** 2012; **N –** 2013. A *Graph View* in the *ArcGIS* interface (GDK-2)

**
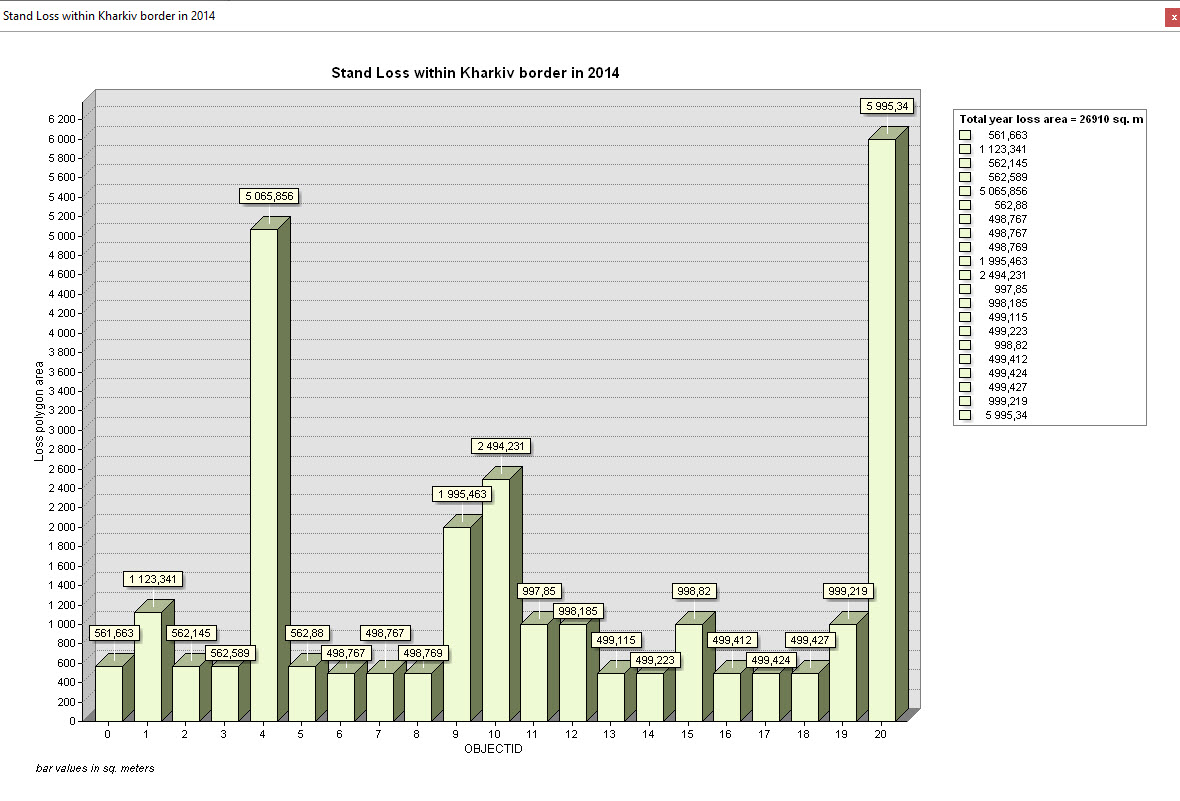
**

**O**

**
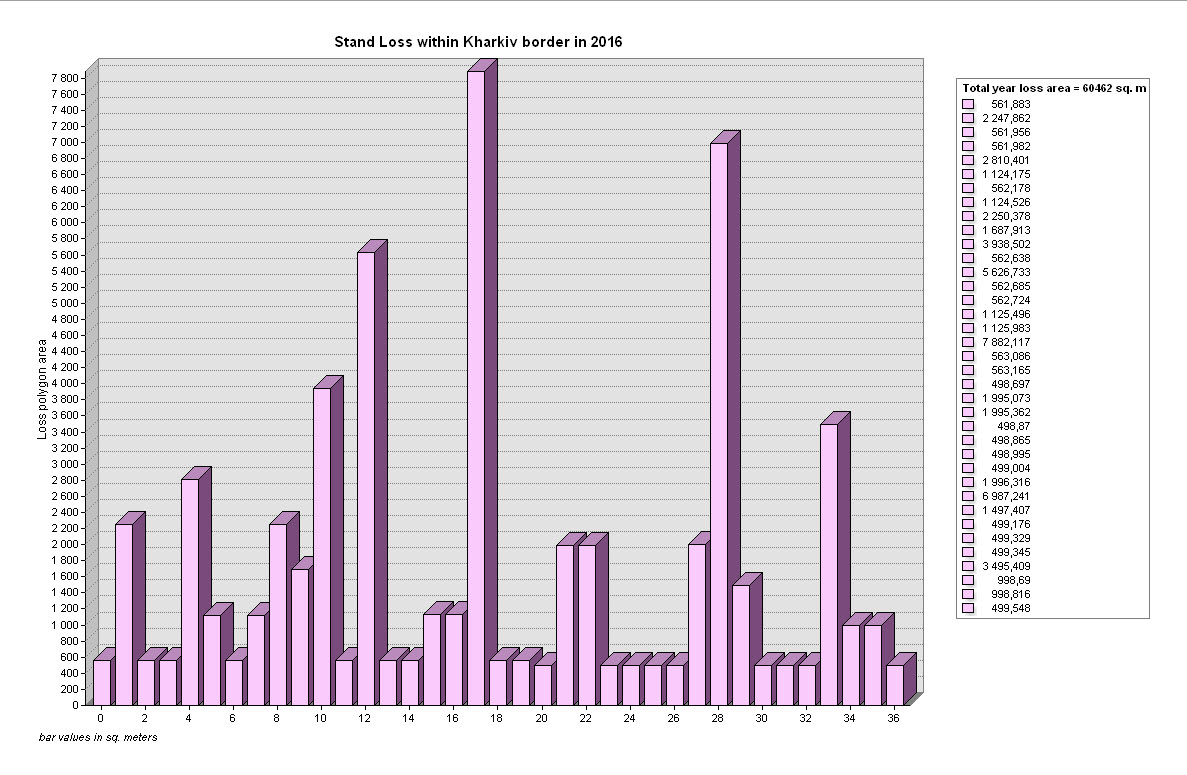
**

**P**

**Supplementary Figure 17**. Vector polygon areas of USL distributions per a Year: **O –** 2014; **P –** 2016. A *Graph View* in the *ArcGIS* interface (GDK-2)


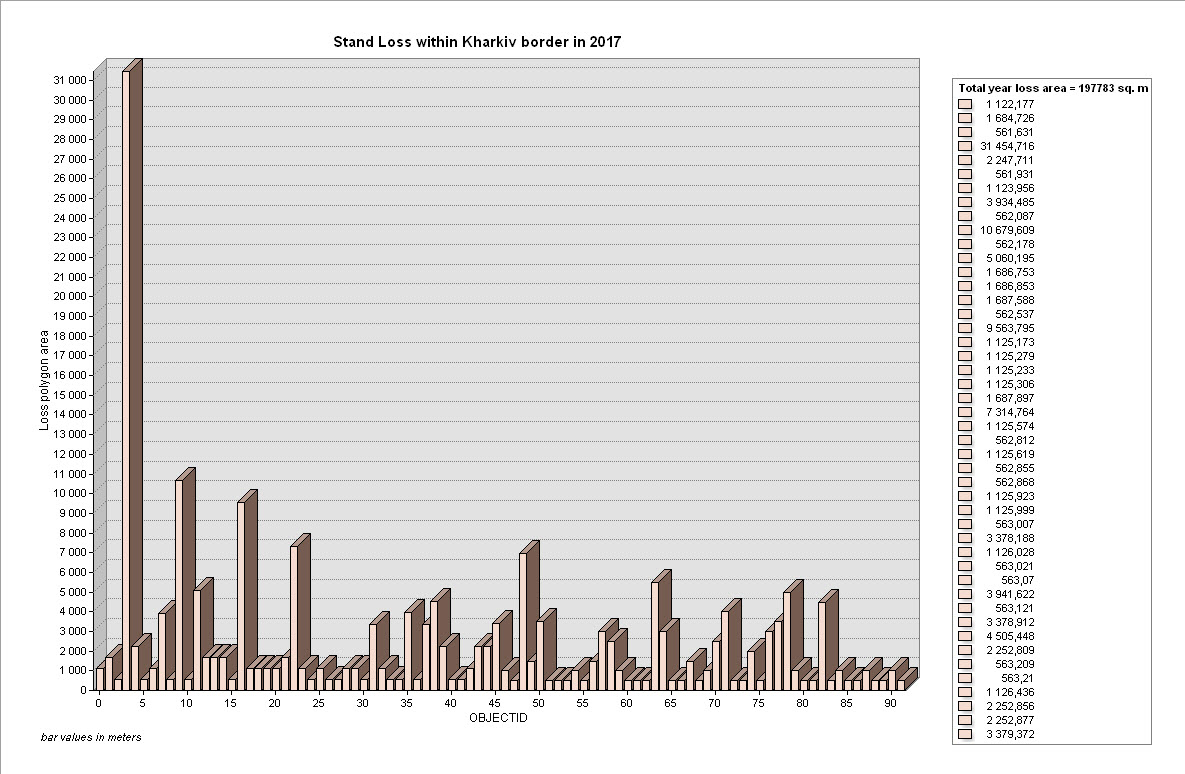


**Q**


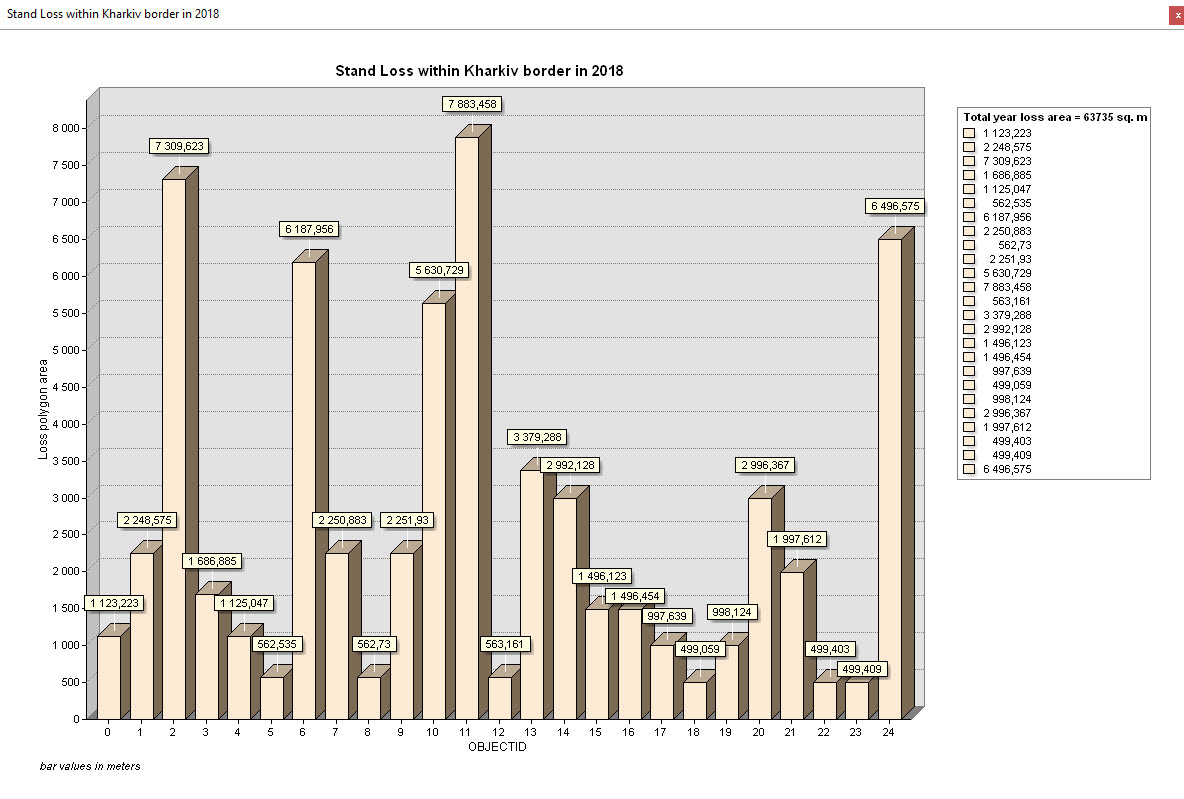


**R**

**Supplementary Figure 17**. Vector polygon areas of USL distributions per a Year: **Q –** 2017; **R –** 2018. A *Graph View* in the *ArcGIS* interface (GDK-2)

**
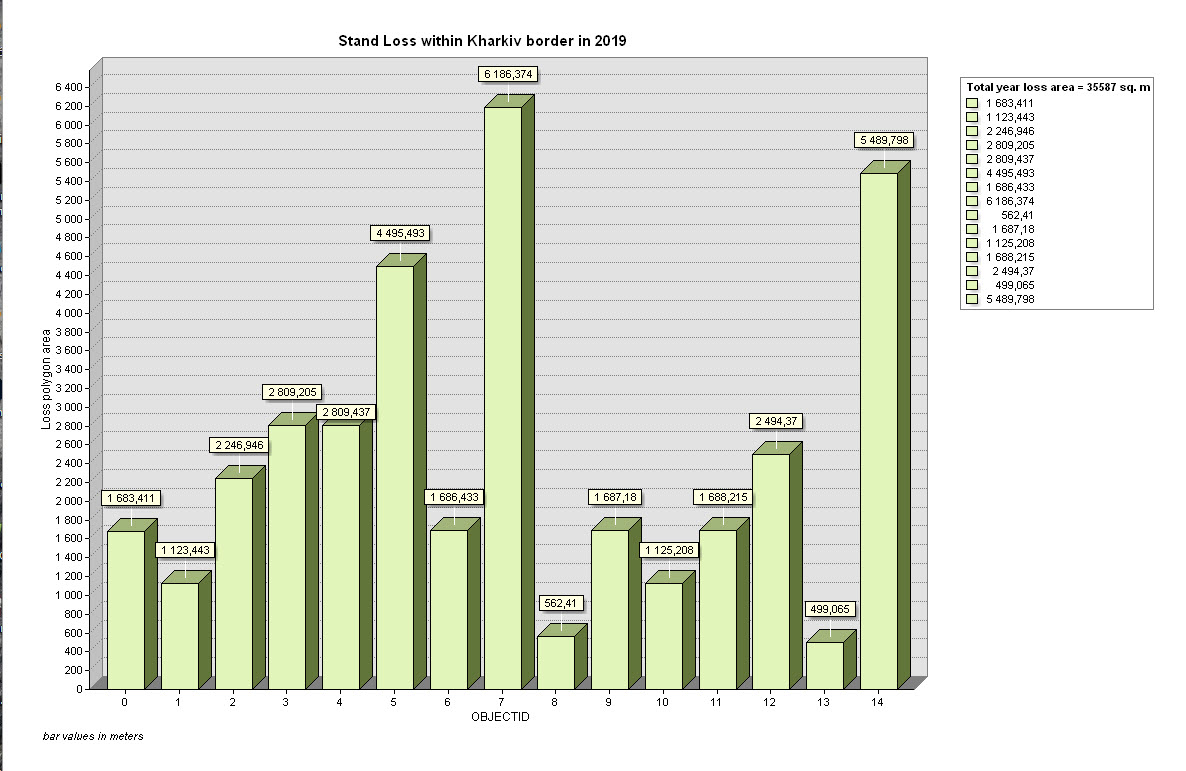
**

**S**

**
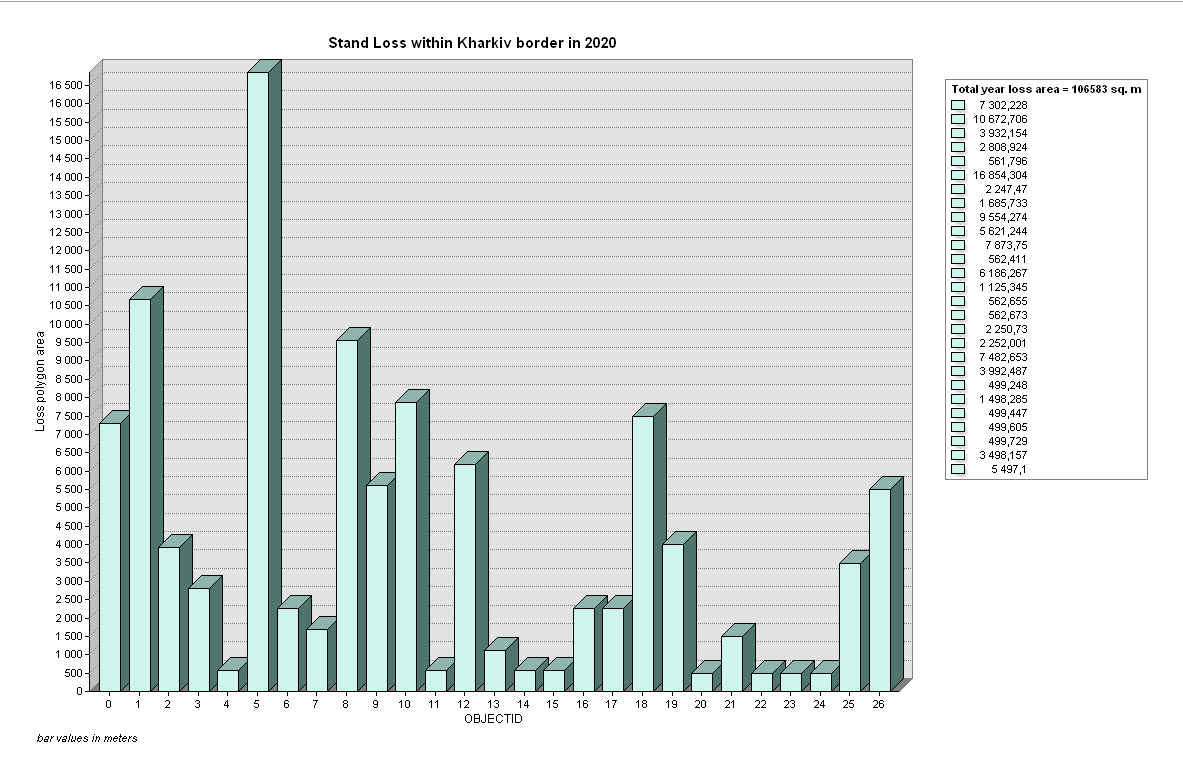
**

**T**

**Supplementary Figure 17**. Vector polygon areas of USL distributions per a Year: **S –** 2019; **T –** 2020. A *Graph View* in the *ArcGIS* interface (GDK-2)
